# Supplementary material for: Polymorphisms in the selectin gene cluster are associated with fertility and survival time in a population of Holstein Friesian cows
Source: PubMed Central journal article supplement (PMC5395145; doi:10.1371/journal.pone.0175555), 2017-04-18
Supplement: pone.0175555.s002.pdf [file pone.0175555.s002.pdf]

**S2 Table. List of the individual SNP genotypes for the cows included in the study.**

| Cow ID | Farm ID | SELP-EXON13<br>rs211179622 | SELP-EXON8<br>rs378218397 | SELP-EXON6<br>rs137027551 | SELP-EXON5<br>rs42312260 | SELP-EXON4<br>rs110033243 | SELL_EXON4<br>rs41803917 | SELL-EXON3<br>rs109966956 | SELE-EXON14<br>rs110045112 |
|--------|---------|----------------------------|---------------------------|---------------------------|--------------------------|---------------------------|--------------------------|---------------------------|----------------------------|
| 607    | 11      | TT                         | GG                        | AG                        | AC                       | CT                        | CC                       | AG                        | CC                         |
| 845    | 17      | AT                         | GG                        | GG                        | CC                       | CT                        | CT                       | GG                        | CG                         |
| 847    | 17      | AT                         | GG                        |                           | CC                       | CT                        |                          | AG                        | CC                         |
| 848    | 17      | AT                         | GG                        | GG                        | CC                       | CC                        | CT                       | GG                        | CG                         |
| 849    | 3       | TT                         | GG                        | GG                        | CC                       | CC                        | CC                       | AA                        | CC                         |
| 850    | 17      | TT                         | AG                        | GG                        | AA                       | TT                        | CC                       | AG                        | CC                         |
| 851    | 3       | TT                         | GG                        | GG                        | AC                       | CT                        | CC                       | GG                        | CC                         |
| 852    | 20      | AA                         | GG                        | GG                        | CC                       | CC                        | TT                       | GG                        | CG                         |
| 1342   | 5       | TT                         | GG                        | AG                        | AA                       | TT                        | CC                       | AA                        | CC                         |
| 1343   | 3       | TT                         | GG                        | GG                        | AC                       | CT                        | CC                       | GG                        | CC                         |
| 1344   | 3       | AT                         | AG                        | AG                        | AC                       | CT                        | CT                       | AG                        | CG                         |
| 1345   | 18      | TT                         | AG                        | AG                        | AA                       | TT                        | CC                       | AA                        | CC                         |
| 1347   | 21      | TT                         | AG                        | AA                        | AA                       | TT                        | CC                       | AA                        | CC                         |
| 1348   | 11      | TT                         | AG                        | GG                        | AC                       | CT                        | CT                       | GG                        | CG                         |
| 1349   | 3       | TT                         | AG                        | AG                        | AA                       | TT                        | CC                       | AA                        | CC                         |
| 1350   | 21      | TT                         | AG                        |                           | AA                       | TT                        | CC                       | AA                        |                            |
| 1352   | 18      | TT                         | GG                        | GG                        | CC                       | CC                        | CT                       | AG                        | CG                         |
| 1353   | 5       | AT                         | GG                        | GG                        | CC                       | CC                        | CT                       | AG                        | CG                         |
| 1354   | 6       | TT                         | GG                        | AA                        | AA                       | TT                        | CC                       | AA                        | CC                         |
| 1355   | 3       | TT                         | AG                        | GG                        | AA                       | TT                        | CC                       | AG                        | CC                         |
| 1356   | 6       | AT                         | GG                        | AG                        | AC                       | CT                        |                          | AG                        | CG                         |
| 1357   | 21      | TT                         | GG                        | GG                        | AC                       | CT                        | CC                       | AG                        | CC                         |
| 1360   | 6       | AT                         | GG                        | GG                        | CC                       | CC                        | CT                       | AG                        | CG                         |
| 1361   | 21      | TT                         | GG                        | AG                        | AC                       | CT                        | CC                       | AA                        | CC                         |

|      |    |    |    |    |    |    |    |    |    |
|------|----|----|----|----|----|----|----|----|----|
| 1362 | 3  | TT | AG | AG | AC | CT | CC | AA | CC |
| 1363 | 3  | TT | AG | AG | AC | CT | CC | AA | CC |
| 1699 | 15 | AT | GG | GG | CC | CC | CT | AG | CG |
| 1701 | 15 | AT | GG |    | CC | CC | CT | AG |    |
| 1702 | 2  | TT | GG | GG | CC | CC | CT | AG | CG |
| 1703 | 2  | TT | AG | AG | AC | CT | CC | AA | CC |
| 1704 | 2  | TT | GG | AG | AC | CT | CC | AA | CC |
| 1706 | 10 | TT | GG | GG | CC | CC | CT | GG | CG |
| 1709 | 4  |    |    |    |    |    |    |    |    |
| 1710 | 6  | AA | GG | GG | CC | CC | TT | GG | GG |
| 1712 | 4  | AT | GG | GG | AC | CT | CT | GG | CG |
| 1714 | 6  | AT | GG | GG | CC | CC | CT | GG | CG |
| 1715 | 6  | AT | GG | GG | CC | CC | CT | AG | CG |
| 1717 | 6  | AT | AG | AG | AC | CT | CT | AG | CG |
| 1720 | 16 | AT | GG | GG | CC | CC | CT | AG | CG |
| 1723 | 21 | AT | AG | GG | AC | CT | CT | GG | CG |
| 1725 | 16 | AT | GG | GG | CC | CC | CT | AG | CG |
| 1726 | 16 | AT | GG |    | CC | CC | CT | AG |    |
| 1727 | 14 | TT | GG |    | AA | TT | CC | AA |    |
| 1729 | 9  | TT | GG |    | AC | CT | CC | AA | CC |
| 1731 | 1  | AT | AG | GG | AC | CT | CT | AG | CG |
| 1732 | 11 | TT | GG | AG | AC | CT | CC | AG | CC |
| 1733 | 1  | AT | GG | GG | CC | CC |    | GG | CG |
| 1734 | 1  | TT | GG |    | CC | CC | CC | AA |    |
| 1735 | 11 | TT | AG |    | AA | TT | CC | GG |    |
| 1736 | 13 | AT | AG | GG | AC | CT | CT | AG |    |
| 1738 | 19 | TT | AG |    | AC | CT | CC | AA | CC |
| 1739 | 19 | TT | AG | AG | AC | CT | CC | AG |    |
| 1740 | 18 | TT | GG | AG | AC | CT | CC | AG | CC |
| 1744 | 20 | AT | GG |    | AC | CC | CT | GG | CG |

|      |    |    |    |    |    |    |    |    |    |
|------|----|----|----|----|----|----|----|----|----|
| 1745 | 20 | TT | GG | AG | AC | CT | CT | AG | CG |
| 1746 | 15 | AT | AG | GG | CC | CC | CT | AG |    |
| 1748 | 15 | TT | GG | GG | AC | CT | CC | AG | CC |
| 1750 | 2  | AT | AG | AG | AC | CT | CT | AG | CG |
| 1751 | 2  | TT |    | AA | AA | TT | CC | AA | CC |
| 1753 | 6  | AT | GG | GG | CC | CC | CT | AG | CG |
| 1755 | 5  | TT | GG | GG | CC | CC | CT | AG | CG |
| 1757 | 4  | AT | AG | GG | AC | CT | CC | AA | CC |
| 1758 | 4  | TT | AG | AG | AA | TT | CC | GG | CC |
| 1760 | 4  | TT | GG | GG | AC | CT | CC | AG | CC |
| 1761 | 5  | AT | GG | AG | AA | TT |    | AA | CC |
| 1762 | 6  | TT | GG | GG | AC | CT | CC | GG | CC |
| 1763 | 6  | TT | GG | AG | AA | TT | CT | GG | CG |
| 1764 | 6  | TT | GG | GG | AC | CT | CC | AG | CC |
| 1765 | 5  | TT | GG | AG | AA | TT | CC | AA | CC |
| 1766 | 6  | TT | AG | AA | AA | TT | CC | AA | CC |
| 1767 | 17 | TT | GG | GG | CC | CC | CT | AG | CG |
| 1768 | 17 | TT | GG |    | CC | CC | CT | AG |    |
| 1770 | 16 | TT | GG | AG | AC | CT | CC | AG | CG |
| 1772 | 21 | TT | AG | GG | AC | CT | CC | AG | CC |
| 1773 | 21 | AT | GG | AG | AC | CT | CT | AG | CG |
| 1776 | 14 | TT | GG | AA | AA | TT | CC | AA | CC |
| 1777 | 14 | TT | GG | AA | AA | TT | CC | AA | CC |
| 1781 | 11 | AT | GG | GG |    | CT | CT | GG | CG |
| 1782 | 3  | AT | AG | AG | AC | CT | CT | AG | CG |
| 1783 | 1  | AT | GG |    | CC | CC | CT | GG |    |
| 1785 | 11 | TT | GG | GG | CC | CC | CC | AG | CC |
| 1786 | 3  | AT | GG | AG | AC | CT | CT | AG | CG |
| 1787 | 12 | AT | AG | AG | AC | CT | CC | AG | CC |
| 1789 | 19 | TT | AG | AG | AC | CT | CC | AA | CC |

|      |    |    |    |    |    |    |    |    |    |
|------|----|----|----|----|----|----|----|----|----|
| 1790 | 19 | AT | AG | GG | AA | TT | CC | AG | CC |
| 1791 | 19 | TT | AG |    | AC | CT | CT | AG |    |
| 1792 | 19 | TT | GG |    | AA | TT |    |    |    |
| 1796 | 15 | TT | AG |    | AA | TT | CC | AA |    |
| 1798 | 15 | TT | AG |    | AA | TT | CC | AA |    |
| 1799 | 2  | TT | AG |    | AC | CT | CC | AG |    |
| 1800 | 2  | AT |    | AG | AA | TT | CC | AA | CC |
| 1801 | 2  | AT | AG | AG | AC | CT | CT | AG | CG |
| 1802 | 10 | TT | AG | AG | AC | CT | CC | AA | CC |
| 1804 | 5  | TT | AG | AG | AC | CT | CC | AA | CC |
| 1810 | 4  | TT | GG | GG | CC | CC | CC | AG | CC |
| 1811 | 5  | AT | AG | AG | AA | TT | CC | AG | CC |
| 1812 | 4  | AT | GG | AG | AC | CT | CT | GG | CG |
| 1813 | 5  | AA | GG |    | AC | CT | TT | GG | CC |
| 1816 | 16 | TT | GG | GG | CC | CC | CC | AA | CC |
| 1817 | 16 | TT | GG | AG | AC | CT | CC | AA | CC |
| 1819 | 14 | TT | AG | AG | AC | CT | CC | AA | CC |
| 1820 | 14 | AT | GG | AG | AA | TT | CC | AG | CC |
| 1821 | 14 | TT | AG | AG | AC | CT | CC | AA | CC |
| 1822 | 14 | TT | AG | AG | AC | CT | CC | AA | CC |
| 1824 | 11 | TT | AG | AG | AC | CT | CC | AG | CC |
| 1825 | 1  | TT | GG | GG | AC | CT | CT | GG | CG |
| 1826 | 1  | TT | AG | GG | AC | CT | CC | GG | CC |
| 1827 | 3  | AT | GG | AG | CC | CC | CC | GG | CC |
| 1828 | 13 | AT | GG | GG | CC | CC | CT | GG | CG |
| 1829 | 12 | TT |    | AA | AA | TT | CC | AA | CC |
| 1830 | 19 |    |    |    | AA | TT | CT | AG | CG |
| 1831 | 19 | TT |    | AG | AC | CT | CT | AA | CG |
| 1832 | 19 | AT | GG |    | AC | CT | CT | AG | CG |
| 1834 | 18 | AT | GG | AG | AC | CT |    | AA | CC |

|      |    |    |    |    |    |    |    |    |    |
|------|----|----|----|----|----|----|----|----|----|
| 1835 | 15 | TT | GG | GG | CC | CC | CC | AA | CC |
| 1837 | 15 | TT | AG |    | AA | TT | CC | AA |    |
| 1838 | 2  | TT | AG | AA | AA | TT | CC | AA | CC |
| 1839 | 10 | TT | AG | AG | AC | CT | CC | AA | CC |
| 1840 | 5  | AT | GG | GG | CC | CC | TT | GG | CG |
| 1841 | 10 | TT | GG |    | CC | CC | CC | AA |    |
| 1843 | 6  | TT | GG | GG | AC | CT | CC | AG | CC |
| 1845 | 5  | AA | GG | GG | CC | CC | TT | GG | GG |
| 1846 | 6  | TT | GG | GG | CC | CC | CC | AA | CC |
| 1847 | 4  | AT | GG | GG | CC | CC | CT | GG | CG |
| 1848 | 5  | AT | GG | GG | CC | CC | CT | AG | CG |
| 1849 | 4  | AT | GG |    | CC | CC | CC | AG |    |
| 1850 | 4  | TT | GG | AG | AA | TT | CC | AG | CC |
| 1852 | 16 | AT | GG | GG | CC | CC | CT | AG | CG |
| 1853 | 21 | TT | AG |    | AA | TT | CC | AG |    |
| 1854 | 21 | AT | GG |    | CC | CC | CT | AG |    |
| 1855 | 14 | AT | AG | AG | AC | CT | CT | AG | CG |
| 1857 | 14 | AT | GG | AG | AC | CT | CC | AA | CC |
| 1861 | 3  | AT | GG | AG | AC | CT | CT | AG | CG |
| 1862 | 3  | AT | AA | GG | AC | CT | CT | AG | CG |
| 1863 | 3  | TT | GG | AG | AA | TT | CC | AG | CC |
| 1864 | 13 | AT | GG | GG | CC | CC | TT | GG |    |
| 1865 | 13 | TT | GG | GG | CC | CC | CC | GG | CC |
| 1866 | 3  | AT | AG |    | CC | CC |    | AG | CC |
| 1867 | 13 | TT | GG | AG | AC | CT | CC | AA | CC |
| 1868 | 13 | AT | GG | GG | AC | CT | CT | GG | CG |
| 1869 | 12 | TT | AG | AG | AC | CT | CT | AG | CG |
| 1870 | 19 | AT | AA | AG | AA | TT | CC | AA | CC |
| 1871 | 19 | AT | GG |    | CC | CC | CT | GG | CG |
| 1874 | 18 | AA | GG | GG | CC | CC | TT | GG | GG |

|      |    |    |    |    |    |    |    |    |    |
|------|----|----|----|----|----|----|----|----|----|
| 1875 | 18 | TT | GG | GG | CC | CC | CC | AA | CC |
| 1879 | 2  | TT | GG |    | CC | CC | CC | AG | CC |
| 1880 | 2  | TT | AG | AA | AA | TT | CC | AG | CC |
| 1881 | 2  | TT | GG |    | AA | TT | CC | AG |    |
| 1883 | 10 | AT | GG |    | AC | CT | CT | GG |    |
| 1884 | 6  | TT | GG | AA | AA | TT | CC | AA | CC |
| 1885 | 4  | AT | GG | GG | CC | CC | CT | GG | CG |
| 1889 | 6  | AT | AG | AG | AC | CT | CT | AG | CG |
| 1890 | 4  | AT | GG | GG | CC | CC | CC | AA | CC |
| 1891 | 4  | TT | GG | AG | AC | CT | CC | AG | CC |
| 1893 | 4  | AT | GG | GG | CC | CC | CT | AG | CG |
| 1896 | 17 | TT | GG | GG | CC | CC | CC | AA | CC |
| 1898 | 21 | AT | GG | GG | CC | CC | CT | AG | CG |
| 1899 | 14 | TT | GG | GG | CC | CC | CC | AA | CC |
| 1900 | 14 | TT | GG | AA | AA | TT | CC | AA | CC |
| 1902 | 14 | TT | AG | AA | AA | TT | CC | AA | CC |
| 1903 | 14 | TT | AG | AA | AA | TT | CC | AA | CC |
| 1904 | 14 | TT | GG | GG | CC | CC | CC | AG | CC |
| 1907 | 1  | TT | AG | AG | AA | TT | CC | AA | CC |
| 1908 | 11 | AT | GG | GG | AC | CT | CT | GG | CG |
| 1909 | 11 | AT | GG | GG | CC | CC | CT | GG | CG |
| 1910 | 3  | TT | GG | AG | AC | CT | CC | AG | CC |
| 1911 | 13 | TT | GG |    | CC | CC | CC | AG | CC |
| 1912 | 12 | TT | GG | GG | CC | CC | CC | AG | CC |
| 1913 | 12 | AT | AG | AA | AA | TT | CC | AA | CC |
| 1914 | 12 | TT | GG | GG | CC | CC | CC | AA | CC |
| 1915 | 12 | TT | AG |    | AC | CT | CC | AG |    |
| 1917 | 19 | TT | GG |    | AC | CT | CC | AG | CG |
| 1918 | 19 | AT | GG | GG | CC | CC | CC | AG | CC |
| 1919 | 18 | TT | GG |    | AC | CT | CC | GG |    |

|      |    |    |    |    |    |    |    |    |    |
|------|----|----|----|----|----|----|----|----|----|
| 1922 | 20 | AT | GG | GG | CC | CC | CT | AG | CG |
| 1925 | 15 | TT | GG | AG | AC | CT | CC | AG | CC |
| 1928 | 2  | TT |    | AA | AA | TT | CC | AG | CC |
| 1929 | 2  | AT | AG | AG | AC | CT | CT | AG | CG |
| 1931 | 10 | AT | AG |    | CC | CT | CC | AA | CC |
| 1932 | 10 | TT | AG |    | AC | CT | CC | AA | CC |
| 1933 | 6  | TT | GG | GG | AC | CT | CC | AG | CC |
| 1935 | 5  | AT | GG | AG | AC | CT | CT | AG | CG |
| 1937 | 5  | TT | GG | GG | AC | CT | CT | GG | CG |
| 1938 | 6  | TT | GG | AG | AC | CT | CC | AA | CC |
| 1939 | 5  | TT | GG | GG | CC | CC | CC | AG | CC |
| 1940 | 6  | AT | GG | GG | CC | CC | TT | AG | CG |
| 1941 | 4  | TT | GG | GG | CC | CC | CT | AG | CG |
| 1942 | 4  | AT | GG | GG | CC | CC | TT | GG | CG |
| 1943 | 5  | TT | GG |    | CC | CC | CT | AA |    |
| 1945 | 17 | AA | GG | GG | CC | CC | CC | AA | CC |
| 1946 | 17 | TT | GG | GG | CC | CC | CC | AA | CC |
| 1947 | 21 | AT | GG |    | CC | CC | CT | GG |    |
| 1949 | 14 | TT | GG |    | CC | CC |    | AG |    |
| 1952 | 1  | TT | AG | AG | AC | CT | CC | AA | CC |
| 1953 | 1  | TT | GG | AG | AA | TT | CC | AG | CC |
| 1954 | 3  | TT | GG | GG | CC | CC | CC | AA | CC |
| 1955 | 13 | TT | GG |    | AC | CT |    |    | CC |
| 1956 | 12 | TT |    | GG | AC | CT | CC | GG | CC |
| 1957 | 12 | TT | GG | AG | AC | CT | CC | AG | CC |
| 1958 | 1  | TT | GG | GG | AC | CT | CT | AG | CG |
| 1962 | 19 | AT |    |    | AC | CT |    |    | CC |
| 1963 | 19 | TT | GG |    | AA | TT | CC | AA | CC |
| 1966 | 15 | TT | GG | GG | AC | CT | CC |    | CC |
| 1967 | 15 | TT | GG | AG | AC | CT | CC | AA | CC |

|      |    |    |    |    |    |    |    |    |    |
|------|----|----|----|----|----|----|----|----|----|
| 1969 | 4  | AT | GG |    | AC | CT | CT | GG |    |
| 1973 | 5  | TT | GG | AG | AC | CT | CC | AA |    |
| 1974 | 4  | TT | GG |    | CC | CC | CC | AA |    |
| 1975 | 4  | AT | GG | AG | AC | CT | CT | AG | CG |
| 1977 | 5  | TT | GG | GG | CC | CC | CC | AG | CC |
| 1978 | 6  | AT | AG | AG | AA | TT | CC | AA | CC |
| 1979 | 4  | TT | GG | AG | AC | CT | CC | AA | CC |
| 1980 | 17 | TT | AA | AG | AA | TT | CC | AG | CC |
| 1983 | 21 | TT | AG | GG | AA | TT | CC | AG | CC |
| 1985 | 14 | TT | AG | AG | AC | CT | CT | AG | CG |
| 1986 | 21 | TT | AG |    | AA | TT |    | AG |    |
| 1987 | 14 | TT | AG | AA | AA | TT | CC | AA | CC |
| 1991 | 11 | AT | GG | AG | AC | CT | CT | AG | CG |
| 1992 | 11 | AT | GG | GG | CC | CC | CT | GG | CG |
| 1993 | 1  | TT | AG |    | AC | CT | CT | AG | CG |
| 1994 | 11 | TT | GG | AG | AC | CT | CC |    | CC |
| 1995 | 3  | TT | AG | GG | CC | CC | CT | AG | CG |
| 1996 | 1  | TT | GG |    | AA | TT | CC | AG |    |
| 1998 | 11 | TT | GG | GG | AA | TT | CC | GG | CC |
| 1999 | 12 | AT | GG |    | CC | CC | CT | GG |    |
| 2000 | 12 | AT | GG | AA | AA | TT | CC | AA | CC |
| 2001 | 1  | TT | GG | GG | AC | CT | CT | AG |    |
| 2003 | 19 | TT | GG | GG | CC | CC | TT | GG | GG |
| 2004 | 19 |    |    |    | AA | TT | CC | AG | CC |
| 2005 | 19 |    | GG |    | CC | CC | TT | AG | CG |
| 2083 | 2  | TT | GG | AG | AC | CT | CC | AA |    |
| 2087 | 16 | AT | GG | GG | CC | CC | CT | GG | CG |
| 2088 | 16 | AT | AG | GG | AA | TT | CT | AG | CG |
| 2089 | 21 | AT | GG | GG | AC | CT | CC | AG | CG |
| 2093 | 11 | TT | AG | AG | AA | TT | CC | AG | CC |

|      |    |    |    |    |    |    |    |    |    |
|------|----|----|----|----|----|----|----|----|----|
| 2095 | 1  | AT | AG | AG | AC | CT | CC | AG | CG |
| 2096 | 3  | TT | GG | AG | AC | CT | CC | GG | CC |
| 2097 | 13 | AT | GG | GG | CC | CC | CT | AG | CG |
| 2102 | 19 | AT |    | AG | AC | CT | CT | AG | CG |
| 2103 | 19 | TT | AG |    | AC | CT | CC | AG |    |
| 2104 | 18 | TT | AA | AG | AA | TT | CC | AA | CC |
| 2107 | 17 | AT | GG | GG | AC | CT | TT | GG | GG |
| 2109 | 16 | AT | AG |    | AC | CT | CT | AG | CG |
| 2110 | 14 | AT | GG |    | CC | CC | CT | AG |    |
| 2111 | 16 | AT | GG | AG | AC | CT | CT | AG | CC |
| 2113 | 14 | AT | GG | GG | AC | CT | CT | GG | CG |
| 2115 | 1  | AT | AG | AG | AC | CT | CT | AG | CG |
| 2116 | 1  | AT | AG | AG | AC | CT | CT | AG | CG |
| 2117 | 1  | AT | AG |    | AA | TT | CC | AA | CC |
| 2118 | 13 | AT | AG | GG | AC | CT | CT | AG | CG |
| 2119 | 13 | TT |    | GG | AC | CT | CC | AA |    |
| 2120 | 12 | TT |    | AG | AC | CT | CC | AG | CC |
| 2121 | 12 | AT | AG | AG | AC | CT | CC | AG | CC |
| 2122 | 8  | TT | AG | GG | AC | CT | CC | AA | CC |
| 2125 | 18 |    |    |    | AC | CT | CC | GG | CC |
| 2126 | 18 | TT | GG | AG | AC | CT | CC | GG | CC |
| 2128 | 16 | TT | AG | AG | AA | TT | CC | AA | CC |
| 2130 | 16 | AT | AG | GG | AC | CT | CT | AG | CC |
| 2131 | 21 | AT | GG | GG | CC | CC | TT | GG | GG |
| 2132 | 16 | AA | GG | GG | CC | CC | TT | GG | GG |
| 2133 | 11 | AT | AG | AG | AC | CT | CT | AG | CG |
| 2134 | 11 | AA | GG | AG | CC | CC | CT | AG | CG |
| 2135 | 1  | TT | GG | GG | AA | TT | CT | GG | CC |
| 2136 | 3  | AT | GG | AG | AC | CT | CT | AG | CG |
| 2137 | 1  | AT | GG |    | AC | CT |    | GG | CC |

|      |    |    |    |    |    |    |    |    |    |
|------|----|----|----|----|----|----|----|----|----|
| 2138 | 13 |    | GG |    | CC | CC | TT | GG | CG |
| 2139 | 13 | AT | AG | AG | AC | CT | CT | AG | CG |
| 2140 | 13 | TT | GG | AG | AC | CT | CC | AA | CC |
| 2141 | 12 | AT |    | AG | AC | CT | CC | AG | CC |
| 2148 | 18 | TT | GG | AG | AC | CT | CC | GG | CC |
| 2150 | 4  | TT | GG |    | AC | CT |    | AG |    |
| 2152 | 16 | TT | AG |    | AA | TT | CC | AA |    |
| 2153 | 16 | AT | AG | AG | AC | CT | CT | AG | CG |
| 2154 | 21 | AT | GG | GG | CC | CC | CT | AG | CG |
| 2155 | 14 | TT | GG | AG | AC | CT | CC | AA | CC |
| 2156 | 14 | TT | GG |    | AC | CT |    | GG | CG |
| 2159 | 11 | AT | GG | GG | CC | CC | CC | AG | CC |
| 2161 | 3  | AT | GG |    | CC | CC | TT | GG |    |
| 2162 | 1  | TT | GG | AG | AC | CT | CC | AG | CC |
| 2163 | 1  | AT | GG |    | AC | CT | CT | GG |    |
| 2164 | 1  | TT | GG | AG | AC | CT | CC | AG | CC |
| 2165 | 3  | TT | AG | AG | AC | CT | CT | AG | CG |
| 2166 | 13 | TT | GG |    | CC | CC |    | GG |    |
| 2167 | 13 | TT | AG | AG | AA | TT | CC | AA |    |
| 2168 | 12 | TT | GG | AG | AC | CT | CC | AA | CC |
| 2169 | 1  | AT | AG | GG | AC | CT | CT | AG | CG |
| 2173 | 19 | TT | GG | AG | AA | TT | CT | AG | CG |
| 2174 | 18 | TT | GG | AG | AC | CT | CC | GG | CC |
| 2175 | 18 | TT | GG | GG | CC | CC | CC | GG | CC |
| 2177 | 4  | TT | GG |    | CC | CC | CC | AA |    |
| 2178 | 21 | TT | GG | AA | AA | TT | CC | AG | CC |
| 2179 | 16 | AA | GG | GG | CC | CC | TT | GG | CG |
| 2180 | 16 | AA | GG | AG | AC | CT | CT | AG | CG |
| 2184 | 1  | AT | AG | GG | AC | CT | CT | AG | CG |
| 2185 | 1  | AT | GG | AG | AC | CT | CT | AG | CG |

|      |    |    |    |    |    |    |    |    |    |
|------|----|----|----|----|----|----|----|----|----|
| 2186 | 13 | AT | GG | AG | AC | CT | CT | AG | CG |
| 2187 | 13 | AT | AG | AG | AC | CT | CT | AG | CG |
| 2188 | 13 | AT | GG | GG | CC | CC | CT | AG | CC |
| 2189 | 13 | TT | AG | AA | AA | TT | CC | AA | CC |
| 2190 | 1  | TT | GG | AA | AA | TT | CC | AA | CC |
| 2191 | 12 | AT | AG | AG | AC | CT | CT | AG | CG |
| 2194 | 8  | AT | GG | AG | AC | CT | CC |    | CG |
| 2195 | 19 | TT |    |    | AC | CT | CT | AG | CG |
| 2196 | 18 | AT | GG | AG | AC | CT | CT | GG | CG |
| 2198 | 20 | AA | GG |    | CC | CC | TT | GG |    |
| 2200 | 14 | AT | GG | GG | AC | CT | CC | AA |    |
| 2201 | 21 | AT | GG | GG | CC | CC | CT | GG | CG |
| 2202 | 16 | TT | AG | GG | AC | CT | CC | AG | CC |
| 2205 | 11 | TT | AG | AA | AA | TT | CC | AA | CC |
| 2206 | 1  | TT | AG |    | AA | TT | CC | AG | CC |
| 2207 | 1  | AT | AG | GG | AC | CT | CT | AG | CG |
| 2209 | 3  | AT | AG | GG | AC | CT | CT | AG | CG |
| 2210 | 13 | TT | AG | GG | AC | CT | CT | AG |    |
| 2211 | 13 | TT | GG | GG | AC | CT | CC | GG | CG |
| 2212 | 13 | AT | GG | GG | CC | CC |    | GG |    |
| 2213 | 13 | TT | GG | AG | AC | CT | CC | AA |    |
| 2214 | 12 | TT | GG | AA | AA | TT | CC | AA | CC |
| 2215 | 12 | TT | GG | GG | AC | CT | CC | AG | CC |
| 2219 | 19 | TT | GG | AG | AC | CT | CT | AG | CG |
| 2220 | 18 | TT | GG |    | AC | CT | CT | GG |    |
| 2221 | 18 | TT | AG | AA | AA | TT | CC | AA | CC |
| 2222 | 18 | TT | GG | AG | AC | CT | CC | AG | CC |
| 2224 | 4  | TT | GG | GG | CC | CC | CC | AA | CC |
| 2225 | 5  | TT | GG | AG | AC | CT | CC | AA | CC |
| 2227 | 14 | TT | GG | AG | AC | CT | CC | AA | CG |

|      |    |    |    |    |    |    |    |    |    |
|------|----|----|----|----|----|----|----|----|----|
| 2228 | 14 | TT | GG | AA | AA | TT | CC | AA | CC |
| 2229 | 14 | AT | GG |    | CC | CC | CT | AG | CG |
| 2232 | 11 | AT | AG | GG | CC | CC |    | AG | CC |
| 2233 | 1  | AT | AG | AG | AC | CT | CT | AG | CG |
| 2234 | 3  | TT | GG | GG | CC | CC | CC | GG | CC |
| 2235 | 13 | TT | GG | AG | AA | TT | CC | AG | CC |
| 2236 | 13 | AT | AG | AG | AA | TT | CC | AA | CC |
| 2237 | 12 | AT |    | AG | AC | CT | CC | AG | CC |
| 2239 | 8  | TT | AG | AG | CC | CT |    | AG | CG |
| 2241 | 18 | TT | GG | GG | CC | CC | CC | AG | CC |
| 2242 | 18 | AT | GG | AG | AC | CT |    | GG | CG |
| 2250 | 13 | AT | GG | GG | AC | CT | CT | GG | CG |
| 2251 | 20 | TT | GG |    | AA | TT | CC | AG |    |
