# Supplementary material for: Polymorphisms in the selectin gene cluster are associated with fertility and survival time in a population of Holstein Friesian cows
Source: PubMed Central journal article supplement (PMC5395145; doi:10.1371/journal.pone.0175555), 2017-04-18
Supplement: pone.0175555.s003.pdf [file pone.0175555.s003.pdf]

**S3 Table. Fertility phenotypes for the cows included in the study#.**

| Cow ID | Farm ID | AFC    | DC_L1  | CI_L1-2 | ASC    | DC_L2  | CI_L2-3 | No. calvings |
|--------|---------|--------|--------|---------|--------|--------|---------|--------------|
| 607    | 11      | 6.7429 | 4.4773 | 5.9135  | 7.1050 | 4.1431 | 5.8289  | 3            |
| 845    | 17      | 6.5323 | 4.7274 | 5.9764  | 6.9856 | 4.5326 | 5.9216  | 3            |
| 847    | 17      | 6.4998 | 4.9836 | 6.0474  | 6.9921 | 4.0431 | 5.8141  | 3            |
| 848    | 17      | 6.5177 | 4.1109 | 5.8260  | 6.9236 | 4.4998 | 5.9135  | 3            |
| 849    | 3       |        |        |         |        |        |         | 0            |
| 850    | 17      | 6.5582 | 4.3175 | 5.8493  | 6.9584 | 4.2195 | 5.8665  | 3            |
| 851    | 3       | 6.9801 | 4.7958 | 6.0186  | 7.3038 | 4.1897 | 5.8348  | 4            |
| 852    | 20      | 6.4615 | 5.1299 | 6.1003  | 6.9903 | 4.9127 | 5.9738  | 3            |
| 1342   | 5       |        |        |         |        |        |         | 0            |
| 1343   | 3       |        |        |         |        |        |         | 0            |
| 1344   | 3       | 7.0211 | 4.7449 | 5.9375  | 7.3126 | 5.0752 | 6.1092  | 3            |
| 1345   | 18      | 6.6619 |        |         |        |        |         | 1            |
| 1347   | 21      | 7.0103 | 4.2047 | 5.8522  | 7.2834 | 4.2905 | 5.8636  | 3            |
| 1348   | 11      | 6.6758 |        |         |        |        |         | 1            |
| 1349   | 3       |        |        |         |        |        |         | 0            |
| 1350   | 21      |        |        |         |        |        |         | 0            |
| 1352   | 18      | 6.5903 | 4.4543 | 5.9054  | 6.9985 | 5.2523 | 6.1759  | 4            |
| 1353   | 5       | 6.6733 | 3.9890 |         |        |        |         | 1            |
| 1354   | 6       | 6.5043 | 4.9127 | 6.0544  | 6.9976 | 4.5747 | 6.1048  | 4            |
| 1355   | 3       | 7.0076 | 5.0876 | 6.1048  | 7.3479 | 4.5539 | 5.9269  | 3            |
| 1356   | 6       | 6.6554 | 4.1271 | 5.8081  | 7.0121 | 4.6347 | 5.9428  | 3            |
| 1357   | 21      |        |        |         |        |        |         | 0            |
| 1360   | 6       | 6.6490 | 4.0431 | 5.7869  | 7.0012 | 5.3566 | 6.2086  | 4            |
| 1361   | 21      | 7.0238 | 3.9890 | 5.8348  | 7.2896 | 4.1271 | 5.8406  | 4            |
| 1362   | 3       | 7.0076 | 4.4886 | 5.9269  | 7.2998 | 4.7362 |         | 2            |
| 1363   | 3       | 7.0076 | 4.3041 | 5.8972  | 7.2923 | 4.0604 | 5.8319  | 3            |
| 1699   | 15      | 6.7346 | 4.4308 | 5.9026  | 7.0959 | 5.0999 |         | 2            |
| 1701   | 15      | 7.0834 | 5.4161 | 6.2206  | 7.4354 | 4.2341 | 5.8551  | 3            |
| 1702   | 2       | 6.7604 | 4.2485 | 5.8522  | 7.0992 |        |         | 2            |
| 1703   | 2       | 6.6908 | 5.3033 | 6.3784  | 7.2399 | 4.6347 | 5.9480  | 3            |
| 1704   | 2       | 6.6834 |        |         |        |        |         | 1            |
| 1706   | 10      | 6.5834 | 6.0890 | 6.5862  | 7.2779 | 5.0938 | 6.0936  | 4            |
| 1709   | 4       | 6.5876 | 4.2905 | 5.8608  | 6.9819 |        |         | 2            |
| 1710   | 6       |        |        |         |        |        |         | 0            |
| 1712   | 4       | 6.5667 | 4.3438 | 5.4553  | 6.8512 |        |         | 2            |
| 1714   | 6       | 6.5862 | 4.1897 | 5.8406  | 6.9745 | 4.1589 |         | 2            |
| 1715   | 6       | 6.5439 | 4.3041 | 5.8833  | 6.9603 | 4.5218 | 5.9108  | 4            |
| 1717   | 6       | 6.5667 | 4.5539 | 5.9108  | 6.9847 | 4.0604 | 5.6937  | 3            |

|      |    |        |        |        |        |        |        |   |
|------|----|--------|--------|--------|--------|--------|--------|---|
| 1720 | 16 | 6.7069 | 4.0604 | 5.8171 | 7.0510 | 5.3132 | 6.1862 | 4 |
| 1723 | 21 | 6.5985 |        |        |        |        |        | 1 |
| 1725 | 16 | 6.8255 | 4.1431 | 5.8319 | 7.1405 |        |        | 2 |
| 1726 | 16 | 6.8287 | 4.5951 | 5.9584 | 7.1785 |        |        | 2 |
| 1727 | 14 | 6.5667 | 4.0775 | 5.8260 | 6.9565 | 4.4308 | 5.9081 | 3 |
| 1729 | 9  | 6.5793 |        |        |        |        |        | 1 |
| 1731 | 1  | 6.7441 | 4.8283 | 5.9506 | 7.1172 | 3.8918 | 5.8081 | 4 |
| 1732 | 11 | 6.7673 | 4.5109 | 5.9243 | 7.1253 |        |        | 2 |
| 1733 | 1  | 6.7166 | 4.1109 | 5.8319 | 7.0622 | 4.8283 | 6.0039 | 3 |
| 1734 | 1  | 6.8405 | 4.9767 |        |        |        |        | 1 |
| 1735 | 11 | 6.8156 | 4.1897 | 5.8579 | 7.1405 | 4.5539 | 5.9349 | 3 |
| 1736 | 13 | 6.8341 | 4.6052 | 5.9349 | 7.1755 | 5.4027 | 6.2186 | 3 |
| 1738 | 19 | 6.7569 | 5.2417 | 6.0868 | 7.1701 | 4.5850 | 5.8889 | 3 |
| 1739 | 19 | 6.6320 | 4.6052 | 5.9189 | 7.0309 | 4.6728 |        | 2 |
| 1740 | 18 | 6.6346 | 4.0604 | 5.8230 | 7.0022 | 4.1431 | 5.8493 | 4 |
| 1744 | 20 | 6.4998 | 5.2257 | 6.1442 | 7.0309 |        |        | 2 |
| 1745 | 20 | 6.5073 | 4.5951 | 5.9402 | 6.9565 | 4.2905 | 5.8493 | 3 |
| 1746 | 15 | 6.7719 | 3.9890 | 5.7777 | 7.0867 | 4.7449 | 5.9610 | 5 |
| 1748 | 15 | 6.6859 | 4.8598 | 6.0234 | 7.1017 | 4.5951 | 5.9428 | 4 |
| 1750 | 2  | 6.6771 | 4.6444 | 5.9480 | 7.0707 |        |        | 2 |
| 1751 | 2  | 6.7286 | 5.1874 | 6.1291 | 7.1663 | 4.8122 | 6.0039 | 5 |
| 1753 | 6  | 6.5482 | 4.6444 | 5.9661 | 6.9921 | 4.8903 | 6.0307 | 4 |
| 1755 | 5  | 6.7358 |        |        |        |        |        | 1 |
| 1757 | 4  |        |        |        |        |        |        | 0 |
| 1758 | 4  |        |        |        |        |        |        | 0 |
| 1760 | 4  | 6.5250 | 6.0403 | 6.5554 | 7.2335 | 4.3307 | 6.2265 | 3 |
| 1761 | 5  | 6.5568 | 5.5134 | 6.2653 | 7.1148 | 4.2627 |        | 2 |
| 1762 | 6  | 6.6134 | 4.7791 | 5.9789 | 7.0388 | 4.1897 | 5.8493 | 3 |
| 1763 | 6  | 6.4892 | 6.0890 | 6.5765 | 7.2269 | 5.0039 | 5.9738 | 3 |
| 1764 | 6  | 6.5425 | 4.3567 | 5.8972 | 6.9641 | 5.4027 | 6.2146 | 3 |
| 1765 | 5  | 6.6254 | 4.2905 | 5.8721 | 7.0112 | 4.9416 | 6.0521 | 5 |
| 1766 | 6  | 6.6147 | 5.9189 | 6.4831 | 7.2442 | 4.7274 | 5.9814 | 4 |
| 1767 | 17 | 6.6821 | 4.1589 | 5.8289 | 7.0370 |        |        | 2 |
| 1768 | 17 | 6.6720 | 4.8828 | 6.0210 | 7.0917 |        | 5.4250 | 3 |
| 1770 | 16 | 6.7776 |        |        |        |        |        | 1 |
| 1772 | 21 | 6.6359 | 4.1431 | 5.8721 | 7.0184 | 4.1109 | 5.8522 | 4 |
| 1773 | 21 | 6.5751 | 4.4886 | 5.9189 | 6.9930 | 3.7842 | 5.7900 | 4 |
| 1776 | 14 | 6.5779 | 4.9698 | 6.0981 | 7.0596 | 4.9200 | 6.0426 | 4 |
| 1777 | 14 | 6.5779 | 4.8675 | 6.0210 | 7.0309 | 5.3279 | 6.1903 | 3 |
| 1781 | 11 | 6.7662 | 4.7362 |        |        |        |        | 1 |
| 1782 | 3  | 7.0031 | 4.6913 |        |        |        |        | 1 |

|      |    |        |        |        |        |        |        |   |
|------|----|--------|--------|--------|--------|--------|--------|---|
| 1783 | 1  | 6.7202 |        |        |        |        |        | 1 |
| 1785 | 11 | 6.7334 | 3.7377 | 5.7494 | 7.0510 | 5.5294 | 6.2804 | 3 |
| 1786 | 3  |        |        |        |        |        |        | 0 |
| 1787 | 12 | 6.8330 | 5.6699 | 6.3544 | 7.3152 | 4.6250 | 5.9480 | 3 |
| 1789 | 19 | 6.6399 |        |        |        |        |        | 1 |
| 1790 | 19 | 6.6026 | 4.3175 | 5.8636 | 6.9930 | 5.2575 | 6.1269 | 4 |
| 1791 | 19 | 6.6970 | 4.7274 | 5.9713 | 7.0917 |        |        | 2 |
| 1792 | 19 | 6.6908 | 4.7536 | 5.8944 | 7.0630 |        |        | 2 |
| 1796 | 15 | 6.8002 |        |        |        |        |        | 1 |
| 1798 | 15 | 6.6821 | 4.3438 | 5.8636 | 7.0475 | 5.6058 | 6.3297 | 3 |
| 1799 | 2  | 6.6490 | 4.7185 | 6.2577 | 7.1655 | 4.3438 | 6.2066 | 3 |
| 1800 | 2  | 6.7452 | 4.3944 | 5.8944 | 7.1009 |        |        | 2 |
| 1801 | 2  | 7.1357 | 4.5539 | 5.9322 | 7.3982 | 5.1761 | 6.1356 | 3 |
| 1802 | 10 | 6.6134 | 4.8203 | 6.0307 | 7.0570 | 4.1109 | 5.8201 | 5 |
| 1804 | 5  | 6.6012 | 4.7791 | 6.4846 | 7.2378 |        |        | 2 |
| 1810 | 4  | 6.5352 | 4.6347 | 5.9454 | 6.9763 | 4.6913 | 5.9216 | 3 |
| 1811 | 5  | 6.6529 | 4.7362 | 5.9789 | 7.0648 | 4.7362 | 5.9402 | 4 |
| 1812 | 4  | 6.6267 | 4.1897 | 5.8493 | 7.0049 | 4.7958 | 5.9940 | 4 |
| 1813 | 5  | 6.6093 | 4.8978 | 6.0162 | 7.0493 | 4.4886 | 5.8805 | 5 |
| 1816 | 16 | 6.7105 |        |        |        |        |        | 1 |
| 1817 | 16 | 6.6644 | 4.1589 | 5.8493 | 7.0309 | 3.7842 | 5.7900 | 4 |
| 1819 | 14 | 6.6093 | 4.2485 | 6.1985 | 7.1180 | 4.3820 | 5.8522 | 3 |
| 1820 | 14 | 6.8544 | 5.1818 | 6.0868 | 7.2356 |        |        | 2 |
| 1821 | 14 | 6.5971 | 4.5539 | 5.9135 | 7.0058 | 4.0431 | 5.7930 | 4 |
| 1822 | 14 | 6.5468 |        |        |        |        |        | 1 |
| 1824 | 11 | 6.8320 | 4.8520 | 6.0259 | 7.2012 | 4.3820 |        | 2 |
| 1825 | 1  | 6.7117 | 4.2047 | 5.8551 | 7.0656 | 4.1109 | 5.8348 | 5 |
| 1826 | 1  | 6.7032 | 5.1417 | 6.1247 | 7.1483 | 5.8141 | 6.4362 | 3 |
| 1827 | 3  | 6.9810 | 4.7362 | 6.0234 | 7.3059 | 4.4427 | 6.1696 | 3 |
| 1828 | 13 | 6.5624 | 4.9345 | 6.0307 | 7.0246 | 5.1358 | 6.1181 | 3 |
| 1829 | 12 | 6.8309 |        |        |        |        |        | 1 |
| 1830 | 19 | 6.5820 |        |        |        |        |        | 1 |
| 1831 | 19 | 6.5554 | 4.1744 | 5.8201 | 6.9470 |        |        | 2 |
| 1832 | 19 | 6.5596 | 4.0254 | 5.7961 | 6.9422 | 4.9836 | 6.0497 | 5 |
| 1834 | 18 | 6.5497 |        |        |        |        |        | 1 |
| 1835 | 15 | 6.7558 | 4.2905 | 5.8551 | 7.0967 | 4.3944 | 5.8749 | 5 |
| 1837 | 15 | 6.6503 | 5.6937 | 6.3596 | 7.2086 | 3.8286 | 5.8111 | 3 |
| 1838 | 2  | 6.7464 | 4.7449 | 5.9610 | 7.1221 | 3.9890 | 5.8377 | 5 |
| 1839 | 10 | 6.9985 | 5.0434 | 6.0684 | 7.3311 |        | 6.4846 | 3 |
| 1840 | 5  | 6.5624 | 4.9767 | 5.9940 | 7.0112 | 4.6728 | 5.9506 | 3 |
| 1841 | 10 | 6.6093 | 4.9273 | 6.0426 | 7.0588 | 4.3438 | 5.8665 | 5 |

|      |    |        |        |        |        |        |        |   |
|------|----|--------|--------|--------|--------|--------|--------|---|
| 1843 | 6  | 6.5985 | 4.2485 | 5.8579 | 6.9884 | 5.3471 | 6.1841 | 5 |
| 1845 | 5  |        |        |        |        |        |        | 0 |
| 1846 | 6  | 6.5073 | 4.9200 | 6.0259 | 6.9884 |        |        | 2 |
| 1847 | 4  | 6.5132 | 4.2195 | 5.8464 | 6.9276 | 5.2523 | 6.1291 | 4 |
| 1848 | 5  | 6.5723 | 4.6913 | 5.9940 | 7.0175 | 5.1985 | 6.1181 | 4 |
| 1849 | 4  | 6.7069 | 4.3307 |        |        |        |        | 1 |
| 1850 | 4  | 6.5695 | 4.0431 | 5.8289 | 6.9594 | 4.6728 | 5.9454 | 3 |
| 1852 | 16 | 6.7968 | 4.6634 | 5.9428 | 7.1515 |        |        | 2 |
| 1853 | 21 | 7.0238 | 4.6540 | 5.9428 | 7.3159 |        |        | 2 |
| 1854 | 21 |        |        |        |        |        |        | 0 |
| 1855 | 14 | 6.6080 | 5.9216 | 6.4892 | 7.2435 | 4.8040 | 6.0113 | 4 |
| 1857 | 14 | 6.6067 | 3.9890 | 5.7991 | 6.9754 | 3.9703 | 5.7900 | 5 |
| 1861 | 3  |        |        |        |        |        |        | 0 |
| 1862 | 3  | 6.9875 | 4.7791 | 6.0088 | 7.3065 | 4.3567 | 5.8999 | 3 |
| 1863 | 3  | 6.9921 | 4.3041 | 5.8777 | 7.2759 | 4.3307 | 5.8916 | 4 |
| 1864 | 13 | 6.6695 | 5.0938 | 6.0936 | 7.1156 | 4.2341 | 5.8551 | 4 |
| 1865 | 13 | 6.6970 | 5.2575 | 6.1420 | 7.1507 |        |        | 2 |
| 1866 | 3  | 7.0022 | 5.0752 | 6.1048 | 7.3441 | 4.4308 | 5.9108 | 3 |
| 1867 | 13 | 6.8112 | 4.8203 | 5.9940 | 7.1770 | 4.0254 | 5.7652 | 3 |
| 1868 | 13 | 6.6067 | 5.0239 | 6.0544 | 7.0613 | 5.9480 | 6.5043 | 3 |
| 1869 | 12 | 6.7719 |        |        |        |        |        | 1 |
| 1870 | 19 | 6.7696 |        |        |        |        |        | 1 |
| 1871 | 19 | 6.5765 | 4.9836 | 6.0497 | 7.0405 | 5.0499 | 6.3561 | 3 |
| 1874 | 18 | 6.6682 | 4.3820 |        |        |        |        | 1 |
| 1875 | 18 | 6.6720 | 4.8122 | 6.0064 | 7.0867 | 3.8918 | 5.7746 | 5 |
| 1879 | 2  | 6.7639 | 4.8978 | 6.0162 | 7.1515 | 4.7095 | 5.8777 | 5 |
| 1880 | 2  | 6.7776 | 4.8040 | 5.9940 | 7.1538 | 4.8122 | 6.1738 | 3 |
| 1881 | 2  | 6.6053 | 5.1358 |        |        |        |        | 1 |
| 1883 | 10 | 6.9939 | 4.9273 | 5.6204 | 7.2196 | 5.2204 | 6.1115 | 4 |
| 1884 | 6  | 6.5221 | 4.7362 | 5.9584 | 6.9726 |        |        | 2 |
| 1885 | 4  | 6.5958 |        |        |        |        |        | 1 |
| 1889 | 6  | 6.6053 | 4.9488 | 6.0450 | 7.0570 | 4.1431 | 5.8493 | 5 |
| 1890 | 4  | 6.5862 | 4.9972 | 6.0661 | 7.0527 | 5.6095 | 6.3172 | 3 |
| 1891 | 4  | 6.5596 | 4.2195 | 5.8665 | 6.9651 |        |        | 2 |
| 1893 | 4  | 6.4968 | 4.9836 | 6.0426 | 6.9884 | 5.8665 | 6.4473 | 4 |
| 1896 | 17 | 6.5539 | 4.2627 | 5.8348 | 6.9508 |        |        | 2 |
| 1898 | 21 | 6.6333 | 3.7612 | 5.6836 | 6.9603 | 4.8978 | 6.0379 | 3 |
| 1899 | 14 | 6.6294 | 4.2767 | 5.8805 | 7.0166 | 4.1109 | 5.8348 | 5 |
| 1900 | 14 | 6.5582 | 4.1109 | 6.5367 | 7.2406 | 4.5109 | 5.9243 | 4 |
| 1902 | 14 | 6.6134 | 4.4773 | 5.8972 | 7.0112 | 3.9318 | 5.7900 | 4 |
| 1903 | 14 | 6.5667 | 3.7136 | 5.2679 | 6.8079 | 5.2417 | 6.1549 | 5 |

|      |    |        |        |        |        |        |        |   |
|------|----|--------|--------|--------|--------|--------|--------|---|
| 1904 | 14 | 6.5309 | 4.3175 | 5.8693 | 6.9470 | 4.8122 | 5.9965 | 5 |
| 1907 | 1  | 6.6606 | 5.0039 | 6.0684 | 7.1009 | 4.8203 | 6.0014 | 4 |
| 1908 | 11 | 6.7673 | 4.2485 | 5.8608 | 7.1066 | 3.7842 | 5.7557 | 4 |
| 1909 | 11 | 6.9441 | 5.4596 | 6.2480 | 7.3486 | 5.4424 | 6.2226 | 3 |
| 1910 | 3  | 7.0536 | 4.0604 | 5.8348 | 7.3126 | 5.9814 |        | 2 |
| 1911 | 13 | 6.6333 | 4.0431 | 5.8230 | 7.0012 | 4.5326 | 5.8999 | 4 |
| 1912 | 12 | 6.8427 | 3.7612 | 5.7900 | 7.1420 | 4.5747 | 5.9216 | 4 |
| 1913 | 12 | 6.8002 | 4.2905 | 5.5334 | 7.0484 |        |        | 2 |
| 1914 | 12 | 6.9078 | 5.7137 | 6.3716 | 7.3683 |        |        | 2 |
| 1915 | 12 | 6.8189 |        |        |        |        |        | 1 |
| 1917 | 19 | 6.5930 |        |        |        |        |        | 1 |
| 1918 | 19 | 6.5667 | 4.5539 | 5.9162 | 6.9866 | 4.0943 |        | 2 |
| 1919 | 18 | 6.6307 | 5.3423 | 6.2005 | 7.1317 | 3.9703 | 5.7961 | 5 |
| 1922 | 20 | 6.5191 | 4.7005 | 6.5653 | 7.2356 |        |        | 2 |
| 1925 | 15 | 6.7742 | 5.3891 | 6.2186 | 7.2277 | 4.9904 | 6.0544 | 4 |
| 1928 | 2  | 6.7310 | 4.7005 | 5.9636 | 7.1123 | 4.0254 | 5.8289 | 4 |
| 1929 | 2  | 6.6983 | 4.3307 | 5.8777 | 7.0630 | 4.5951 | 5.9610 | 4 |
| 1931 | 10 | 6.5930 | 5.2983 | 6.2025 | 7.1099 | 3.9890 | 5.8171 | 4 |
| 1932 | 10 | 6.5971 | 4.7005 | 5.9610 | 7.0220 | 4.0073 | 5.8111 | 4 |
| 1933 | 6  | 6.6307 | 4.1431 | 5.8464 | 7.0067 | 5.2523 | 6.1356 | 4 |
| 1935 | 5  | 6.5820 | 4.0604 | 5.8081 | 6.9613 | 4.1431 | 5.8377 | 5 |
| 1937 | 5  | 6.5236 | 4.1897 | 5.8377 | 6.9315 | 4.4308 | 5.8889 | 4 |
| 1938 | 6  | 6.5425 | 4.9345 | 6.0355 | 7.0139 | 5.1240 | 6.0981 | 5 |
| 1939 | 5  | 6.5236 | 5.0562 | 6.0730 | 7.0166 | 4.4067 | 5.8916 | 3 |
| 1940 | 6  | 6.5439 | 4.7875 | 5.9814 | 6.9948 | 5.4161 | 6.2305 | 5 |
| 1941 | 4  | 6.5028 | 4.9558 | 6.0615 | 6.9994 | 4.7005 |        | 2 |
| 1942 | 4  | 6.6080 | 4.1109 | 5.8406 | 6.9893 | 5.2679 | 6.1485 | 5 |
| 1943 | 5  | 6.5667 | 4.8520 | 5.9814 | 7.0094 | 4.2047 | 5.8608 | 4 |
| 1945 | 17 | 6.6039 | 4.9558 | 6.0379 | 7.0536 | 4.3567 |        | 0 |
| 1946 | 17 | 6.6053 | 4.0775 | 5.8081 | 6.9773 | 5.1180 |        | 0 |
| 1947 | 21 | 6.6580 | 3.8918 | 5.8141 | 7.0157 | 5.2575 | 6.1675 | 3 |
| 1949 | 14 | 6.5889 | 4.6540 | 5.9610 | 7.0166 | 4.1744 | 5.8636 | 3 |
| 1952 | 1  | 6.7130 | 3.7377 | 6.3261 | 7.2313 | 5.2832 | 6.1759 | 3 |
| 1953 | 1  | 6.9295 | 4.5747 |        |        |        |        | 1 |
| 1954 | 3  | 6.9847 | 4.4427 | 5.9081 | 7.2779 | 4.6347 | 5.9506 | 4 |
| 1955 | 13 |        |        |        |        |        |        | 0 |
| 1956 | 12 | 6.8373 | 4.1589 | 5.8522 | 7.1546 | 4.3307 | 5.8833 | 4 |
| 1957 | 12 |        |        |        |        |        |        | 0 |
| 1958 | 1  | 6.6670 | 4.6444 | 5.9349 | 7.0596 | 5.1059 | 6.0936 | 4 |
| 1962 | 19 | 6.6294 | 4.2195 |        |        |        |        | 1 |
| 1963 | 19 |        |        |        |        |        |        | 0 |

|      |    |        |        |        |        |        |        |   |
|------|----|--------|--------|--------|--------|--------|--------|---|
| 1966 | 15 | 6.6859 | 4.8122 | 5.9865 | 7.0892 | 3.7842 | 5.7807 | 4 |
| 1967 | 15 | 7.1009 | 4.5539 | 5.9189 | 7.3683 |        |        | 2 |
| 1969 | 4  | 6.7776 | 4.1271 | 5.8319 | 7.1058 | 4.6444 |        | 2 |
| 1973 | 5  | 6.6067 | 4.2341 | 5.7869 | 6.9717 | 4.2047 | 5.8289 | 5 |
| 1974 | 4  | 6.5639 | 4.1109 | 5.8201 | 6.9527 | 4.1589 | 5.8348 | 3 |
| 1975 | 4  | 6.5236 | 4.3175 |        |        |        |        | 1 |
| 1977 | 5  | 6.5453 | 4.5643 | 5.8721 | 6.9575 | 4.6347 | 5.9322 | 5 |
| 1978 | 6  | 6.5667 | 4.4659 |        |        |        |        | 1 |
| 1979 | 4  | 6.5294 | 4.6913 | 5.9558 | 6.9763 | 5.3566 | 6.2066 | 5 |
| 1980 | 17 | 6.5944 | 6.1356 |        |        |        |        | 0 |
| 1983 | 21 | 6.9994 | 5.3519 | 6.2106 | 7.3740 |        |        | 2 |
| 1985 | 14 |        |        |        |        |        |        | 0 |
| 1986 | 21 |        |        |        |        |        |        | 0 |
| 1987 | 14 |        |        |        |        |        |        | 0 |
| 1991 | 11 | 6.7991 | 5.5530 | 6.2860 | 7.2682 | 4.9488 | 6.0283 | 3 |
| 1992 | 11 | 6.4520 |        |        |        |        |        | 1 |
| 1993 | 1  | 6.8721 | 4.7791 | 5.9915 | 7.2189 | 5.7430 | 6.3835 | 3 |
| 1994 | 11 | 6.6995 | 4.6634 | 6.4409 | 7.2717 | 4.2905 | 5.8665 | 3 |
| 1995 | 3  | 7.0012 | 4.6728 | 5.9764 | 7.3079 | 4.4998 | 5.9081 | 3 |
| 1996 | 1  | 6.7202 |        |        |        |        |        | 1 |
| 1998 | 11 | 6.7696 |        |        |        |        |        | 1 |
| 1999 | 12 | 6.8522 | 5.8889 | 6.4677 | 7.3715 | 4.3438 |        | 2 |
| 2000 | 12 | 6.7405 | 5.3083 | 6.2106 | 7.2034 | 4.2485 | 5.8665 | 3 |
| 2001 | 1  | 6.7020 | 4.0604 | 5.8171 | 7.0475 | 4.6540 | 5.9506 | 3 |
| 2003 | 19 | 6.5779 | 3.8067 | 5.7621 | 6.9441 | 5.1059 | 6.0890 | 3 |
| 2004 | 19 | 6.6464 | 4.9698 | 6.0331 | 7.0792 | 5.0938 | 6.0684 | 3 |
| 2005 | 19 | 6.6346 | 4.3820 | 5.8861 | 7.0220 | 4.6821 | 5.9584 | 4 |
| 2083 | 2  | 6.7334 | 4.4886 | 5.9081 | 7.0967 | 4.4543 | 5.9081 | 4 |
| 2087 | 16 |        |        |        |        |        |        | 0 |
| 2088 | 16 | 6.7464 | 4.7362 | 6.0014 | 7.1349 | 5.4510 | 6.2364 | 3 |
| 2089 | 21 | 6.5596 | 4.1897 | 5.8435 | 6.9575 | 4.6151 | 5.9558 | 4 |
| 2093 | 11 | 6.8711 | 4.2047 | 5.8551 | 7.1801 |        |        | 2 |
| 2095 | 1  | 6.6567 | 4.8442 |        |        |        |        | 1 |
| 2096 | 3  | 6.9801 | 4.5433 | 5.9322 | 7.2807 | 4.2341 | 5.8665 | 4 |
| 2097 | 13 | 6.6147 | 4.9698 | 6.0331 | 7.0588 | 5.0876 |        | 2 |
| 2102 | 19 |        |        |        |        |        |        | 0 |
| 2103 | 19 |        |        |        |        |        |        | 0 |
| 2104 | 18 |        |        |        |        |        |        | 0 |
| 2107 | 17 | 6.6012 | 4.2767 | 5.8435 | 6.9856 | 5.0752 |        | 0 |
| 2109 | 16 | 6.6783 | 4.4543 | 5.9243 | 7.0639 | 6.0497 | 6.5610 | 3 |
| 2110 | 14 | 6.6320 | 4.8903 | 6.0776 | 7.0859 | 4.8520 | 5.7683 | 3 |

|      |    |        |        |        |        |        |        |   |
|------|----|--------|--------|--------|--------|--------|--------|---|
| 2111 | 16 | 6.6451 | 5.4681 | 6.2653 | 7.1663 |        |        | 2 |
| 2113 | 14 | 6.5834 | 4.2195 | 5.8721 | 6.9829 | 3.7136 | 5.7961 | 5 |
| 2115 | 1  | 6.7393 | 4.5850 | 5.9322 | 7.1082 | 5.6595 | 6.3648 | 4 |
| 2116 | 1  | 6.6821 |        |        |        |        |        | 1 |
| 2117 | 1  | 6.7081 | 4.4998 | 5.9054 | 7.0783 | 5.6204 | 6.3008 | 4 |
| 2118 | 13 | 6.4922 | 5.1240 | 6.1026 | 7.0094 | 3.8918 | 5.8230 | 4 |
| 2119 | 13 | 6.6720 | 4.1744 | 5.8579 | 7.0388 | 4.1109 | 5.8171 | 4 |
| 2120 | 12 | 6.8265 | 5.2933 | 6.1883 | 7.2506 | 5.3279 | 6.2005 | 3 |
| 2121 | 12 | 6.8309 |        |        |        |        |        | 1 |
| 2122 | 8  | 6.7250 |        |        |        |        |        | 1 |
| 2125 | 18 | 6.5596 | 3.9703 | 5.8141 | 6.9479 | 3.5553 | 5.8171 | 5 |
| 2126 | 18 | 6.7957 | 4.1744 | 5.8693 | 7.1293 | 4.2767 |        | 0 |
| 2128 | 16 | 6.7867 |        |        |        |        |        | 1 |
| 2130 | 16 | 6.7935 | 4.9836 |        |        |        |        | 1 |
| 2131 | 21 | 6.5410 | 4.6151 | 5.9506 | 6.9819 | 4.4188 |        | 2 |
| 2132 | 16 | 6.7393 | 5.4596 | 6.2403 | 7.2138 |        | 5.9738 | 3 |
| 2133 | 11 | 6.7262 | 4.6540 | 5.9402 | 7.1017 | 5.0562 | 6.0730 | 4 |
| 2134 | 11 | 6.7639 | 4.0073 | 5.8377 | 7.0975 |        |        | 2 |
| 2135 | 1  | 6.7429 | 4.0943 | 5.8289 | 7.0800 | 5.1761 | 6.1334 | 4 |
| 2136 | 3  | 6.9976 |        |        |        |        |        | 1 |
| 2137 | 1  | 6.6995 | 4.6728 | 5.9687 | 7.0926 | 4.4773 | 5.9081 | 4 |
| 2138 | 13 | 6.5889 |        |        |        |        |        | 1 |
| 2139 | 13 | 6.5497 | 6.1003 |        |        |        |        | 1 |
| 2140 | 13 | 6.5013 | 5.4205 | 6.2344 | 7.0699 | 4.7449 | 5.9865 | 3 |
| 2141 | 12 | 6.8090 | 6.1570 | 6.6307 | 7.4170 | 5.5984 |        | 0 |
| 2148 | 18 | 6.7093 | 4.5539 | 5.9189 | 7.0834 | 4.4427 | 5.9108 | 3 |
| 2150 | 4  |        |        |        |        |        |        | 0 |
| 2152 | 16 | 6.7788 | 4.4543 | 5.9189 | 7.1317 | 5.5175 |        | 2 |
| 2153 | 16 | 6.7346 | 4.1271 | 5.8377 | 7.0767 | 5.0106 | 6.0615 | 3 |
| 2154 | 21 |        |        |        |        |        |        | 0 |
| 2155 | 14 | 6.5709 | 4.2905 | 5.8608 | 6.9707 | 4.0073 |        | 2 |
| 2156 | 14 | 6.5958 |        |        |        |        |        | 1 |
| 2159 | 11 | 6.9393 | 4.0775 | 5.8406 | 7.2269 | 4.7095 |        | 2 |
| 2161 | 3  | 6.9939 | 4.9273 | 5.9661 | 7.2998 | 4.6913 | 6.0064 | 3 |
| 2162 | 1  | 6.6464 | 6.0137 | 6.5511 | 7.2930 | 4.6913 | 6.0426 | 3 |
| 2163 | 1  | 6.7250 | 3.8286 | 5.7777 | 7.0527 | 5.1705 | 6.1312 | 4 |
| 2164 | 1  | 6.7382 | 5.4681 | 6.2953 | 7.2342 | 4.6052 |        | 2 |
| 2165 | 3  | 6.9967 | 4.2767 | 5.8693 | 7.2772 |        |        | 2 |
| 2166 | 13 | 6.6134 | 4.7185 | 5.9480 | 7.0282 | 5.0876 | 5.7777 | 3 |
| 2167 | 13 | 6.5723 | 6.0615 |        |        |        |        | 1 |
| 2168 | 12 | 6.6995 | 5.1874 | 6.1356 | 7.1499 | 4.3820 | 5.9108 | 4 |

|      |    |        |        |        |        |        |        |   |
|------|----|--------|--------|--------|--------|--------|--------|---|
| 2169 | 1  | 6.6554 | 3.9120 | 5.7777 | 7.0031 | 5.1761 | 6.0753 | 4 |
| 2173 | 19 | 6.6758 | 3.8712 | 5.7683 | 7.0148 |        |        | 2 |
| 2174 | 18 | 6.8997 | 5.4293 | 6.3491 | 7.3550 |        | 5.7869 | 4 |
| 2175 | 18 | 6.6682 | 5.4806 | 6.2653 | 7.1801 | 4.8203 | 6.0088 | 3 |
| 2177 | 4  | 6.5610 | 3.9703 | 5.8021 | 6.9451 |        |        | 2 |
| 2178 | 21 | 6.6093 | 5.4972 | 6.2519 | 7.1397 | 4.9127 | 6.0137 | 3 |
| 2179 | 16 | 6.7856 | 5.5013 | 6.4785 | 7.3369 | 5.3982 |        | 0 |
| 2180 | 16 | 6.6946 | 4.2627 | 5.8693 | 7.0579 | 4.3438 | 5.8693 | 4 |
| 2184 | 1  | 6.6746 |        |        |        |        |        | 1 |
| 2185 | 1  | 6.7105 | 5.3230 | 6.1862 | 7.1755 | 5.3083 | 6.1675 | 3 |
| 2186 | 13 | 6.6720 | 4.3307 | 5.8721 | 7.0432 | 4.0073 | 5.8081 | 4 |
| 2187 | 13 | 6.5653 | 4.7005 | 6.4345 | 7.1952 |        |        | 2 |
| 2188 | 13 | 6.5944 | 4.5747 | 5.9402 | 7.0130 | 4.6821 | 5.9636 | 3 |
| 2189 | 13 | 6.5468 |        |        |        |        |        | 1 |
| 2190 | 1  | 6.7154 | 4.3944 | 5.9026 | 7.0825 | 3.8712 | 5.7869 | 3 |
| 2191 | 12 | 6.7685 | 4.7536 | 6.2226 | 7.2255 | 4.0604 | 5.8406 | 4 |
| 2194 | 8  | 6.7754 | 5.9890 | 6.5043 | 7.3421 |        |        | 2 |
| 2195 | 19 | 6.6214 | 4.2341 | 5.8693 | 7.0076 | 4.1897 | 5.8435 | 5 |
| 2196 | 18 | 6.6120 | 5.8805 | 6.4583 | 7.2313 |        |        | 2 |
| 2198 | 20 | 6.5147 | 5.0239 | 6.0730 | 7.0112 | 5.0562 | 6.0684 | 3 |
| 2200 | 14 | 6.8057 |        |        |        |        |        | 1 |
| 2201 | 21 | 6.6386 | 4.6052 | 5.9454 | 7.0440 | 4.3438 | 5.8944 | 4 |
| 2202 | 16 |        |        |        |        |        |        | 0 |
| 2205 | 11 | 6.6983 |        |        |        |        |        | 1 |
| 2206 | 1  | 6.6884 | 5.0999 | 6.1092 | 7.1333 |        |        | 2 |
| 2207 | 1  | 6.6503 | 5.8944 | 6.5453 | 7.2923 | 5.7589 |        | 2 |
| 2209 | 3  | 6.9958 |        |        |        |        |        | 1 |
| 2210 | 13 | 6.5309 | 5.0370 | 6.0661 | 7.0184 | 4.2047 | 5.7807 | 4 |
| 2211 | 13 | 6.6147 | 5.2417 | 6.1420 | 7.0992 | 4.5109 | 5.9269 | 3 |
| 2212 | 13 | 6.6995 | 4.8752 |        |        |        |        | 1 |
| 2213 | 13 | 6.6884 | 4.7095 | 5.9636 | 7.0834 | 4.9904 | 6.0497 | 4 |
| 2214 | 12 | 6.7190 | 4.0943 | 5.8319 | 7.0639 | 4.9628 | 6.0426 | 4 |
| 2215 | 12 | 6.7867 |        |        |        |        |        | 1 |
| 2219 | 19 | 6.6227 | 4.3438 | 5.8377 | 6.9985 |        |        | 2 |
| 2220 | 18 | 6.6438 | 4.0943 | 5.8636 | 7.0211 | 4.6444 | 5.9349 | 4 |
| 2221 | 18 | 6.6120 | 4.2767 | 5.8608 | 6.9985 | 4.8363 | 6.0331 | 3 |
| 2222 | 18 | 6.6067 | 4.2627 | 5.8861 | 7.0031 | 4.6347 | 5.9789 | 3 |
| 2224 | 4  | 6.5396 | 3.9512 | 5.8051 | 6.9315 | 4.8903 | 6.0210 | 5 |
| 2225 | 5  | 6.5309 | 4.0254 | 5.8141 | 6.9285 |        |        | 2 |
| 2227 | 14 |        |        |        |        |        |        | 0 |
| 2228 | 14 | 6.6053 |        |        |        |        |        | 1 |

|      |    |        |        |        |        |        |        |   |
|------|----|--------|--------|--------|--------|--------|--------|---|
| 2229 | 14 | 6.5737 |        |        |        |        |        | 1 |
| 2232 | 11 | 6.7901 | 3.9318 | 5.8171 | 7.1107 |        |        | 2 |
| 2233 | 1  | 6.7007 | 5.2204 | 6.1506 | 7.1562 | 3.9120 |        | 2 |
| 2234 | 3  | 6.9930 | 4.7791 |        |        |        |        | 1 |
| 2235 | 13 | 6.5439 | 4.6728 |        |        |        |        | 1 |
| 2236 | 13 | 6.6147 | 5.1705 | 6.1181 | 7.0901 | 4.6444 | 5.9402 | 4 |
| 2237 | 12 | 6.7776 | 5.0938 | 6.1225 | 7.1959 | 4.4308 | 5.9081 | 3 |
| 2239 | 8  | 6.7238 | 6.4409 | 6.8046 | 7.4582 |        |        | 2 |
| 2241 | 18 | 6.5751 | 4.3567 | 5.8944 | 6.9847 | 3.9703 | 5.8171 | 3 |
| 2242 | 18 | 6.5667 | 5.3230 | 6.1506 | 7.0733 | 4.0431 | 5.8348 | 4 |
| 2250 | 13 | 6.4739 | 4.9488 | 6.0426 | 6.9745 |        |        | 2 |
| 2251 | 20 | 6.5367 | 4.3694 | 5.8805 | 6.9546 | 4.4308 |        | 2 |

#L1, lactation 1; L2, lactation 2; AFC, age at first calving; ASC, age at second calving, DC, days from calving to conception; CI, calving interval. Log<sub>e</sub> values were used to normalise distributions, except for the number of calvings.
