# Supplementary material for: Polymorphisms in the selectin gene cluster are associated with fertility and survival time in a population of Holstein Friesian cows
Source: PubMed Central journal article supplement (PMC5395145; doi:10.1371/journal.pone.0175555), 2017-04-18
Supplement: pone.0175555.s004.pdf [file pone.0175555.s004.pdf]

**S4 Table. Survival times for the cows included in the study.**

| Cow ID | Farm ID | Culled<br>0 = No<br>1=Yes | Days birth to<br>culling# |
|--------|---------|---------------------------|---------------------------|
| 607    | 11      | 1                         | 1688                      |
| 845    | 17      | 0                         | 2340                      |
| 847    | 17      | 0                         | 2340                      |
| 848    | 17      | 0                         | 2340                      |
| 849    | 3       | 1                         | 234                       |
| 850    | 17      | 0                         | 2340                      |
| 851    | 3       | 0                         | 2340                      |
| 852    | 20      | 0                         | 2340                      |
| 1342   | 5       | 1                         | 843                       |
| 1343   | 3       | 1                         | 230                       |
| 1344   | 3       | 0                         | 2340                      |
| 1345   | 18      | 1                         | 1491                      |
| 1347   | 21      | 0                         | 2340                      |
| 1348   | 11      | 1                         | 906                       |
| 1349   | 3       | 1                         | 237                       |
| 1350   | 21      | 1                         | 922                       |
| 1352   | 18      | 0                         | 2340                      |
| 1353   | 5       | 1                         | 928                       |
| 1354   | 6       | 1                         | 2096                      |
| 1355   | 3       | 0                         | 2340                      |
| 1356   | 6       | 1                         | 1970                      |
| 1357   | 21      | 1                         | 376                       |
| 1360   | 6       | 1                         | 2144                      |
| 1361   | 21      | 0                         | 2340                      |
| 1362   | 3       | 1                         | 1972                      |
| 1363   | 3       | 1                         | 1905                      |
| 1699   | 15      | 1                         | 1633                      |
| 1701   | 15      | 0                         | 2340                      |
| 1702   | 2       | 1                         | 1253                      |
| 1703   | 2       | 1                         | 1967                      |
| 1704   | 2       | 1                         | 800                       |
| 1706   | 10      | 0                         | 2340                      |
| 1709   | 4       | 1                         | 1085                      |
| 1710   | 6       | 1                         | 857                       |
| 1712   | 4       | 1                         | 1187                      |
| 1714   | 6       | 1                         | 1558                      |
| 1715   | 6       | 1                         | 2014                      |
| 1717   | 6       | 1                         | 1379                      |
| 1720   | 16      | 0                         | 2340                      |
| 1723   | 21      | 1                         | 1226                      |
| 1725   | 16      | 1                         | 1263                      |
| 1726   | 16      | 1                         | 1879                      |

|      |    |   |      |
|------|----|---|------|
| 1727 | 14 | 1 | 1640 |
| 1729 | 9  | 1 | 1090 |
| 1731 | 1  | 0 | 2340 |
| 1732 | 11 | 0 | 2340 |
| 1733 | 1  | 1 | 1704 |
| 1734 | 1  | 1 | 1502 |
| 1735 | 11 | 0 | 2340 |
| 1736 | 13 | 0 | 2340 |
| 1738 | 19 | 1 | 1697 |
| 1739 | 19 | 1 | 1475 |
| 1740 | 18 | 0 | 2340 |
| 1744 | 20 | 1 | 1511 |
| 1745 | 20 | 1 | 1486 |
| 1746 | 15 | 0 | 2340 |
| 1748 | 15 | 0 | 2340 |
| 1750 | 2  | 1 | 1306 |
| 1751 | 2  | 0 | 2340 |
| 1753 | 6  | 1 | 2066 |
| 1755 | 5  | 1 | 954  |
| 1757 | 4  | 1 | 318  |
| 1758 | 4  | 1 | 851  |
| 1760 | 4  | 1 | 2332 |
| 1761 | 5  | 1 | 1393 |
| 1762 | 6  | 1 | 1495 |
| 1763 | 6  | 1 | 1791 |
| 1764 | 6  | 1 | 1972 |
| 1765 | 5  | 0 | 2340 |
| 1766 | 6  | 0 | 2340 |
| 1767 | 17 | 1 | 1244 |
| 1768 | 17 | 0 | 2340 |
| 1770 | 16 | 1 | 1796 |
| 1772 | 21 | 0 | 2340 |
| 1773 | 21 | 0 | 2340 |
| 1776 | 14 | 0 | 2340 |
| 1777 | 14 | 1 | 1918 |
| 1781 | 11 | 1 | 1262 |
| 1782 | 3  | 1 | 1476 |
| 1783 | 1  | 1 | 1310 |
| 1785 | 11 | 0 | 2340 |
| 1786 | 3  | 0 | 2340 |
| 1787 | 12 | 0 | 2340 |
| 1789 | 19 | 1 | 1490 |
| 1790 | 19 | 1 | 1948 |
| 1791 | 19 | 1 | 1693 |
| 1792 | 19 | 1 | 1470 |
| 1796 | 15 | 1 | 978  |

|      |    |   |      |
|------|----|---|------|
| 1798 | 15 | 1 | 2193 |
| 1799 | 2  | 0 | 2340 |
| 1800 | 2  | 1 | 1367 |
| 1801 | 2  | 0 | 2340 |
| 1802 | 10 | 0 | 2340 |
| 1804 | 5  | 1 | 1860 |
| 1810 | 4  | 1 | 1654 |
| 1811 | 5  | 1 | 2207 |
| 1812 | 4  | 1 | 2035 |
| 1813 | 5  | 0 | 2340 |
| 1816 | 16 | 1 | 857  |
| 1817 | 16 | 0 | 2340 |
| 1819 | 14 | 1 | 1603 |
| 1820 | 14 | 1 | 1566 |
| 1821 | 14 | 1 | 1825 |
| 1822 | 14 | 1 | 962  |
| 1824 | 11 | 1 | 1578 |
| 1825 | 1  | 0 | 2340 |
| 1826 | 1  | 0 | 2340 |
| 1827 | 3  | 0 | 2340 |
| 1828 | 13 | 1 | 1809 |
| 1829 | 12 | 1 | 1353 |
| 1830 | 19 | 1 | 1757 |
| 1831 | 19 | 1 | 1120 |
| 1832 | 19 | 0 | 2340 |
| 1834 | 18 | 1 | 1557 |
| 1835 | 15 | 0 | 2340 |
| 1837 | 15 | 1 | 2008 |
| 1838 | 2  | 1 | 2292 |
| 1839 | 10 | 0 | 2340 |
| 1840 | 5  | 1 | 1646 |
| 1841 | 10 | 0 | 2340 |
| 1843 | 6  | 0 | 2340 |
| 1845 | 5  | 1 | 850  |
| 1846 | 6  | 1 | 1438 |
| 1847 | 4  | 1 | 2004 |
| 1848 | 5  | 1 | 2270 |
| 1849 | 4  | 1 | 1157 |
| 1850 | 4  | 1 | 1493 |
| 1852 | 16 | 1 | 1949 |
| 1853 | 21 | 0 | 2340 |
| 1854 | 21 | 1 | 921  |
| 1855 | 14 | 0 | 2340 |
| 1857 | 14 | 0 | 2340 |
| 1861 | 3  | 1 | 264  |
| 1862 | 3  | 0 | 2340 |

|      |    |   |      |
|------|----|---|------|
| 1863 | 3  | 0 | 2340 |
| 1864 | 13 | 0 | 2340 |
| 1865 | 13 | 1 | 1523 |
| 1866 | 3  | 0 | 2340 |
| 1867 | 13 | 0 | 2340 |
| 1868 | 13 | 1 | 1935 |
| 1869 | 12 | 1 | 1001 |
| 1870 | 19 | 1 | 1104 |
| 1871 | 19 | 1 | 1982 |
| 1874 | 18 | 1 | 971  |
| 1875 | 18 | 0 | 2340 |
| 1879 | 2  | 0 | 2340 |
| 1880 | 2  | 1 | 1866 |
| 1881 | 2  | 1 | 1782 |
| 1883 | 10 | 0 | 2340 |
| 1884 | 6  | 1 | 1390 |
| 1885 | 4  | 1 | 1162 |
| 1889 | 6  | 0 | 2340 |
| 1890 | 4  | 1 | 1772 |
| 1891 | 4  | 1 | 1724 |
| 1893 | 4  | 0 | 2340 |
| 1896 | 17 | 1 | 1044 |
| 1898 | 21 | 0 | 2340 |
| 1899 | 14 | 0 | 2340 |
| 1900 | 14 | 0 | 2340 |
| 1902 | 14 | 1 | 1939 |
| 1903 | 14 | 0 | 2340 |
| 1904 | 14 | 0 | 2340 |
| 1907 | 1  | 0 | 2340 |
| 1908 | 11 | 0 | 2340 |
| 1909 | 11 | 0 | 2340 |
| 1910 | 3  | 1 | 2111 |
| 1911 | 13 | 0 | 2340 |
| 1912 | 12 | 0 | 2340 |
| 1913 | 12 | 1 | 1153 |
| 1914 | 12 | 1 | 1658 |
| 1915 | 12 | 1 | 933  |
| 1917 | 19 | 1 | 1484 |
| 1918 | 19 | 1 | 1690 |
| 1919 | 18 | 0 | 2340 |
| 1922 | 20 | 1 | 1409 |
| 1925 | 15 | 0 | 2340 |
| 1928 | 2  | 1 | 2257 |
| 1929 | 2  | 0 | 2340 |
| 1931 | 10 | 0 | 2340 |
| 1932 | 10 | 0 | 2340 |

|      |    |   |      |
|------|----|---|------|
| 1933 | 6  | 0 | 2340 |
| 1935 | 5  | 0 | 2340 |
| 1937 | 5  | 1 | 2072 |
| 1938 | 6  | 0 | 2340 |
| 1939 | 5  | 1 | 1877 |
| 1940 | 6  | 0 | 2340 |
| 1941 | 4  | 1 | 1530 |
| 1942 | 4  | 0 | 2340 |
| 1943 | 5  | 1 | 2058 |
| 1945 | 17 | 0 | 2340 |
| 1946 | 17 | 0 | 2340 |
| 1947 | 21 | 0 | 2340 |
| 1949 | 14 | 1 | 1557 |
| 1952 | 1  | 0 | 2340 |
| 1953 | 1  | 1 | 1301 |
| 1954 | 3  | 0 | 2340 |
| 1955 | 13 | 1 | 885  |
| 1956 | 12 | 0 | 2340 |
| 1957 | 12 | 1 | 1861 |
| 1958 | 1  | 0 | 2340 |
| 1962 | 19 | 1 | 1619 |
| 1963 | 19 | 1 | 548  |
| 1966 | 15 | 0 | 2340 |
| 1967 | 15 | 1 | 1813 |
| 1969 | 4  | 1 | 1575 |
| 1973 | 5  | 1 | 2089 |
| 1974 | 4  | 1 | 1398 |
| 1975 | 4  | 1 | 960  |
| 1977 | 5  | 0 | 2340 |
| 1978 | 6  | 1 | 1149 |
| 1979 | 4  | 0 | 2340 |
| 1980 | 17 | 0 | 2340 |
| 1983 | 21 | 1 | 1884 |
| 1985 | 14 | 1 | 335  |
| 1986 | 21 | 1 | 906  |
| 1987 | 14 | 1 | 321  |
| 1991 | 11 | 0 | 2340 |
| 1992 | 11 | 1 | 645  |
| 1993 | 1  | 0 | 2340 |
| 1994 | 11 | 0 | 2340 |
| 1995 | 3  | 1 | 2202 |
| 1996 | 1  | 1 | 1028 |
| 1998 | 11 | 1 | 1331 |
| 1999 | 12 | 1 | 1845 |
| 2000 | 12 | 0 | 2340 |
| 2001 | 1  | 1 | 2036 |

|      |    |   |      |
|------|----|---|------|
| 2003 | 19 | 1 | 1709 |
| 2004 | 19 | 1 | 1658 |
| 2005 | 19 | 0 | 2340 |
| 2083 | 2  | 0 | 2340 |
| 2087 | 16 | 1 | 1141 |
| 2088 | 16 | 0 | 2340 |
| 2089 | 21 | 0 | 2340 |
| 2093 | 11 | 1 | 1478 |
| 2095 | 1  | 1 | 1534 |
| 2096 | 3  | 0 | 2340 |
| 2097 | 13 | 1 | 1555 |
| 2102 | 19 | 1 | 954  |
| 2103 | 19 | 1 | 832  |
| 2104 | 18 | 1 | 799  |
| 2107 | 17 | 0 | 2340 |
| 2109 | 16 | 0 | 2340 |
| 2110 | 14 | 1 | 1675 |
| 2111 | 16 | 1 | 1565 |
| 2113 | 14 | 0 | 2340 |
| 2115 | 1  | 0 | 2340 |
| 2116 | 1  | 1 | 838  |
| 2117 | 1  | 0 | 2340 |
| 2118 | 13 | 0 | 2340 |
| 2119 | 13 | 0 | 2340 |
| 2120 | 12 | 0 | 2340 |
| 2121 | 12 | 1 | 961  |
| 2122 | 8  | 1 | 855  |
| 2125 | 18 | 0 | 2340 |
| 2126 | 18 | 0 | 2340 |
| 2128 | 16 | 1 | 1305 |
| 2130 | 16 | 1 | 1418 |
| 2131 | 21 | 1 | 1485 |
| 2132 | 16 | 0 | 2340 |
| 2133 | 11 | 0 | 2340 |
| 2134 | 11 | 1 | 1810 |
| 2135 | 1  | 0 | 2340 |
| 2136 | 3  | 1 | 1561 |
| 2137 | 1  | 0 | 2340 |
| 2138 | 13 | 1 | 730  |
| 2139 | 13 | 1 | 1235 |
| 2140 | 13 | 0 | 2340 |
| 2141 | 12 | 0 | 2340 |
| 2148 | 18 | 0 | 2340 |
| 2150 | 4  | 1 | 847  |
| 2152 | 16 | 1 | 1727 |
| 2153 | 16 | 0 | 2340 |

|      |    |   |      |
|------|----|---|------|
| 2154 | 21 | 1 | 910  |
| 2155 | 14 | 1 | 1384 |
| 2156 | 14 | 1 | 903  |
| 2159 | 11 | 1 | 1713 |
| 2161 | 3  | 0 | 2340 |
| 2162 | 1  | 1 | 1988 |
| 2163 | 1  | 0 | 2340 |
| 2164 | 1  | 1 | 1614 |
| 2165 | 3  | 1 | 1552 |
| 2166 | 13 | 1 | 1545 |
| 2167 | 13 | 1 | 1195 |
| 2168 | 12 | 0 | 2340 |
| 2169 | 1  | 1 | 1932 |
| 2173 | 19 | 1 | 1481 |
| 2174 | 18 | 0 | 2340 |
| 2175 | 18 | 0 | 2340 |
| 2177 | 4  | 1 | 1113 |
| 2178 | 21 | 0 | 2340 |
| 2179 | 16 | 0 | 2340 |
| 2180 | 16 | 0 | 2340 |
| 2184 | 1  | 1 | 849  |
| 2185 | 1  | 1 | 2129 |
| 2186 | 13 | 0 | 2340 |
| 2187 | 13 | 1 | 1459 |
| 2188 | 13 | 1 | 1965 |
| 2189 | 13 | 1 | 830  |
| 2190 | 1  | 1 | 1686 |
| 2191 | 12 | 0 | 2340 |
| 2194 | 8  | 1 | 1830 |
| 2195 | 19 | 0 | 2340 |
| 2196 | 18 | 1 | 1524 |
| 2198 | 20 | 0 | 2340 |
| 2200 | 14 | 1 | 980  |
| 2201 | 21 | 0 | 2340 |
| 2202 | 16 | 1 | 1251 |
| 2205 | 11 | 1 | 1619 |
| 2206 | 1  | 1 | 1381 |
| 2207 | 1  | 1 | 2033 |
| 2209 | 3  | 1 | 1275 |
| 2210 | 13 | 0 | 2340 |
| 2211 | 13 | 1 | 1643 |
| 2212 | 13 | 1 | 1117 |
| 2213 | 13 | 0 | 2340 |
| 2214 | 12 | 0 | 2340 |
| 2215 | 12 | 1 | 919  |
| 2219 | 19 | 1 | 1098 |

|      |    |   |      |
|------|----|---|------|
| 2220 | 18 | 0 | 2340 |
| 2221 | 18 | 0 | 2340 |
| 2222 | 18 | 1 | 1574 |
| 2224 | 4  | 0 | 2340 |
| 2225 | 5  | 1 | 1422 |
| 2227 | 14 | 1 | 800  |
| 2228 | 14 | 1 | 1052 |
| 2229 | 14 | 1 | 951  |
| 2232 | 11 | 1 | 1248 |
| 2233 | 1  | 1 | 1603 |
| 2234 | 3  | 1 | 1359 |
| 2235 | 13 | 1 | 844  |
| 2236 | 13 | 0 | 2340 |
| 2237 | 12 | 0 | 2340 |
| 2239 | 8  | 1 | 1735 |
| 2241 | 18 | 0 | 2340 |
| 2242 | 18 | 0 | 2340 |
| 2250 | 13 | 1 | 1554 |
| 2251 | 20 | 1 | 1206 |

# Censored at 2340 days of age
