# Supplementary material for: Polymorphisms in the selectin gene cluster are associated with fertility and survival time in a population of Holstein Friesian cows
Source: PubMed Central journal article supplement (PMC5395145; doi:10.1371/journal.pone.0175555), 2017-04-18
Supplement: pone.0175555.s005.pdf [file pone.0175555.s005.pdf]

**S5 Table. Milk phenotypes for the cows included in the study#.**

| Cow ID | Farm ID | TMY_L1 | 305d_L1 | PMY_L1 | TMY_L2 | 305d_L2 | PMY_L2 | SCC class |
|--------|---------|--------|---------|--------|--------|---------|--------|-----------|
| 607    | 11      | 10920  | 10516   | 43.4   | 10459  |         | 57.4   | 0         |
| 845    | 17      | 7604   | 7384    |        | 10206  | 9905    |        |           |
| 847    | 17      | 8271   | 7581    |        | 9377   |         |        |           |
| 848    | 17      | 5654   |         |        | 7893   |         |        |           |
| 849    | 3       |        |         |        |        |         |        |           |
| 850    | 17      | 7649   |         |        | 9497   |         |        |           |
| 851    | 3       | 6415   | 6063    | 31.2   | 6860   |         | 40.1   | 0         |
| 852    | 20      | 8744   | 7060    | 37.1   | 9055   | 8207    | 40.5   |           |
| 1342   | 5       |        |         |        |        |         |        |           |
| 1343   | 3       |        |         |        |        |         |        |           |
| 1344   | 3       | 8314   |         | 35.5   | 12185  | 11324   |        | 1         |
| 1345   | 18      | 12848  | 7211    | 29.8   |        |         |        | 1         |
| 1347   | 21      | 7328   |         | 35.6   | 8509   |         | 39.6   | 0         |
| 1348   | 11      | 2689   |         | 28.3   |        |         |        |           |
| 1349   | 3       |        |         |        |        |         |        |           |
| 1350   | 21      |        |         |        |        |         |        |           |
| 1352   | 18      | 8695   | 8572    | 39.2   | 11776  | 11103   | 45.6   | 1         |
| 1353   | 5       | 4344   |         | 37.1   |        |         |        |           |
| 1354   | 6       | 11991  | 10140   | 35.9   | 13855  | 12052   | 44.1   |           |
| 1355   | 3       | 8217   | 6942    | 31.9   | 9338   |         | 46.3   | 2         |
| 1356   | 6       | 10264  |         | 37.4   | 9496   | 9065    | 40.1   | 2         |
| 1357   | 21      |        |         |        |        |         |        |           |
| 1360   | 6       | 7661   |         | 29     | 5549   |         | 22.2   | 1         |
| 1361   | 21      | 7898   |         | 34.8   | 7754   |         | 40     | 1         |
| 1362   | 3       | 6454   | 6341    | 25.5   | 7642   | 7465    | 32.1   | 2         |
| 1363   | 3       | 7485   |         | 30.3   | 8456   |         | 43.8   | 1         |
| 1699   | 15      | 6099   | 6036    | 24.9   | 7532   | 7135    | 33.4   |           |
| 1701   | 15      | 5866   | 5641    | 26.8   | 8376   |         | 34.8   |           |
| 1702   | 2       | 435    |         |        |        |         |        |           |
| 1703   | 2       | 14943  | 8146    | 34.3   | 11448  | 11086   |        | 1         |
| 1704   | 2       |        |         |        |        |         |        |           |
| 1706   | 10      | 14449  | 7686    |        | 11340  | 9880    |        | 2         |
| 1709   | 4       | 7526   |         | 25.5   | 197    |         |        |           |
| 1710   | 6       |        |         |        |        |         |        |           |
| 1712   | 4       | 7389   |         | 32.3   | 3814   |         | 15.9   |           |
| 1714   | 6       | 8857   | 8857    | 29.3   | 14953  | 10101   | 39.2   | 0         |
| 1715   | 6       | 9742   | 9564    | 35.4   | 10388  | 9622    | 38     | 1         |
| 1717   | 6       | 8076   | 7203    | 29.7   |        |         |        |           |

|      |    |       |       |      |       |       |      |   |
|------|----|-------|-------|------|-------|-------|------|---|
| 1720 | 16 | 8684  |       | 37.5 | 12229 | 10626 | 45.5 | 1 |
| 1723 | 21 | 8483  | 8154  | 37.2 |       |       |      | 1 |
| 1725 | 16 | 12316 | 11041 | 41.7 |       |       |      |   |
| 1726 | 16 | 11141 | 9939  | 42   | 7338  | 4120  | 22   | 1 |
| 1727 | 14 | 8411  |       | 33.7 | 8914  | 8588  | 38.9 | 1 |
| 1729 | 9  |       |       |      |       |       |      |   |
| 1731 | 1  | 10285 | 9271  | 36   | 9919  |       | 43   | 1 |
| 1732 | 11 | 11751 | 11115 | 44.5 |       |       | 47.4 | 2 |
| 1733 | 1  | 8122  |       | 32.3 | 11631 | 11357 | 45.5 | 1 |
| 1734 | 1  | 13112 | 8445  | 35.4 |       |       |      | 0 |
| 1735 | 11 | 5256  | 5256  | 25.7 | 10262 | 10032 | 45.6 | 1 |
| 1736 | 13 | 8899  | 8086  | 34.4 | 11922 |       |      | 1 |
| 1738 | 19 | 14077 | 10600 |      | 7128  | 7027  | 39.8 | 1 |
| 1739 | 19 | 11788 | 11079 |      | 9931  | 9370  | 38.3 | 0 |
| 1740 | 18 | 9422  |       | 39.1 | 11993 | 11888 | 48.2 | 2 |
| 1744 | 20 | 10046 | 8753  | 35.6 | 7283  |       | 32.4 |   |
| 1745 | 20 | 7899  | 7682  |      | 9373  |       | 38.6 |   |
| 1746 | 15 | 6644  |       | 27.4 | 9340  | 8728  | 34.5 |   |
| 1748 | 15 | 9114  | 8418  | 37.2 | 8246  | 7928  | 41   |   |
| 1750 | 2  | 8526  | 7735  | 30.9 | 4131  |       | 42.7 | 0 |
| 1751 | 2  | 129   |       |      | 8806  | 8122  | 34   | 2 |
| 1753 | 6  | 9071  | 8317  | 28.2 | 12678 | 10970 | 52.7 | 2 |
| 1755 | 5  | 2408  |       | 26.1 |       |       |      |   |
| 1757 | 4  |       |       |      |       |       |      |   |
| 1758 | 4  |       |       |      |       |       |      |   |
| 1760 | 4  | 12338 | 8366  | 31.3 | 13816 | 10801 | 49.2 |   |
| 1761 | 5  | 9021  | 7490  | 29.5 | 5014  |       | 42.5 |   |
| 1762 | 6  | 10064 | 8976  | 37.6 | 9207  | 9207  | 41   |   |
| 1763 | 6  | 12723 | 8322  | 30.6 | 13413 | 11287 | 56.1 |   |
| 1764 | 6  | 8357  | 8130  | 28.2 | 8764  | 7687  | 42.5 | 1 |
| 1765 | 5  | 7337  | 7337  | 29.4 | 10818 | 9536  | 43.7 |   |
| 1766 | 6  | 10776 | 8969  | 35.6 | 9048  | 8447  | 34.8 |   |
| 1767 | 17 | 1479  |       |      |       |       |      |   |
| 1768 | 17 | 11690 | 6739  |      |       |       |      |   |
| 1770 | 16 | 18458 | 7344  | 28.7 |       |       |      | 1 |
| 1772 | 21 | 10572 |       | 46.2 | 11165 |       | 45.4 | 1 |
| 1773 | 21 | 8381  | 8346  | 39   | 9912  |       | 44   | 1 |
| 1776 | 14 | 8802  | 7862  | 33.9 | 11494 | 10624 | 42.3 | 1 |
| 1777 | 14 | 9973  | 8799  | 36   | 13233 | 10476 | 45.4 | 2 |
| 1781 | 11 | 9966  | 8640  | 36.8 |       |       |      | 1 |
| 1782 | 3  | 8309  | 8012  | 34   |       |       |      | 2 |

|      |    |       |       |      |       |       |      |   |
|------|----|-------|-------|------|-------|-------|------|---|
| 1783 | 1  | 12354 | 8923  | 32.3 |       |       |      | 1 |
| 1785 | 11 | 9183  |       | 44.2 | 11172 | 10253 | 47.7 | 1 |
| 1786 | 3  |       |       |      |       |       |      |   |
| 1787 | 12 | 13370 | 9183  | 33.8 | 9883  | 9258  | 38.3 | 1 |
| 1789 | 19 | 19810 | 9246  | 32.9 |       |       |      | 0 |
| 1790 | 19 | 8786  |       |      | 12266 | 9612  | 36.5 | 0 |
| 1791 | 19 | 11820 | 10913 |      | 14685 | 12773 | 51.6 | 0 |
| 1792 | 19 | 10652 | 9415  |      | 5252  |       | 31.3 | 0 |
| 1796 | 15 | 2000  |       |      |       |       |      |   |
| 1798 | 15 | 8212  | 8212  | 36.1 | 12142 | 9923  | 44   |   |
| 1799 | 2  | 10866 | 7743  | 35.5 | 12989 | 10779 |      | 1 |
| 1800 | 2  | 7835  | 7835  | 29.2 | 5639  |       | 39.2 | 1 |
| 1801 | 2  | 8714  | 8400  |      | 10756 | 9150  | 36.1 | 0 |
| 1802 | 10 | 8532  | 7757  |      | 9291  |       |      | 1 |
| 1804 | 5  | 10736 | 8267  | 33   | 11026 | 8918  | 35   | 1 |
| 1810 | 4  | 10919 | 9738  | 33   | 7509  | 7509  | 31.6 |   |
| 1811 | 5  | 10291 | 9348  | 37.9 | 12173 | 11059 | 43.9 |   |
| 1812 | 4  | 9504  |       | 39.9 | 14374 | 12933 | 54.7 | 1 |
| 1813 | 5  | 11226 | 9880  | 38.4 | 10526 | 10320 | 42.6 |   |
| 1816 | 16 | 1526  |       |      |       |       |      |   |
| 1817 | 16 | 7449  |       | 32.2 | 8446  |       | 39.4 | 2 |
| 1819 | 14 | 7641  |       | 31.1 | 11225 | 10314 | 46.3 | 1 |
| 1820 | 14 | 12069 | 9358  | 36.5 | 6379  |       | 43.3 | 0 |
| 1821 | 14 | 7401  | 7085  | 28.3 | 9200  | 9200  | 45   | 1 |
| 1822 | 14 | 4404  |       | 19   |       |       |      | 0 |
| 1824 | 11 | 9948  | 9036  | 38.7 | 9640  |       | 54.3 | 2 |
| 1825 | 1  | 9606  |       | 37.9 | 11551 |       | 44.2 | 2 |
| 1826 | 1  | 12782 | 10404 | 37.4 | 16530 | 11867 | 45.8 | 1 |
| 1827 | 3  | 8126  | 7774  | 34.6 | 12362 | 9920  | 43.6 | 2 |
| 1828 | 13 | 8733  | 7671  | 27.4 | 11487 |       | 42.8 | 0 |
| 1829 | 12 | 10387 | 7575  | 30   |       |       |      | 1 |
| 1830 | 19 | 28500 | 10096 | 41.7 |       |       |      | 0 |
| 1831 | 19 | 8263  |       |      | 2994  |       |      |   |
| 1832 | 19 | 10555 |       |      | 14139 | 12426 | 50.8 | 0 |
| 1834 | 18 | 17022 | 7179  | 29.2 |       |       |      | 0 |
| 1835 | 15 | 8741  |       | 36.1 | 10649 | 10385 | 41   |   |
| 1837 | 15 | 12061 | 8636  | 34.5 | 7912  |       | 37   |   |
| 1838 | 2  | 7508  | 7117  | 32.7 | 7151  |       | 34.4 | 1 |
| 1839 | 10 | 9816  | 8369  |      | 12505 | 9163  |      | 2 |
| 1840 | 5  | 10082 | 8657  | 30.6 | 10962 | 10042 | 42.8 | 1 |
| 1841 | 10 | 9949  | 8889  |      | 10155 | 10059 |      | 1 |

|      |    |       |       |      |       |       |      |   |
|------|----|-------|-------|------|-------|-------|------|---|
| 1843 | 6  | 8384  | 8332  | 27.4 | 7603  | 7603  | 30.7 |   |
| 1845 | 5  |       |       |      |       |       |      |   |
| 1846 | 6  | 12678 | 11033 | 40   | 9411  | 8467  | 41.1 | 1 |
| 1847 | 4  | 9912  | 9827  | 35.8 | 10926 | 9656  | 42.8 | 1 |
| 1848 | 5  | 1179  |       | 11.2 | 12818 | 11282 | 39.3 | 1 |
| 1849 | 4  | 9418  | 8773  | 40.3 |       |       |      |   |
| 1850 | 4  | 8455  |       | 32.3 | 10137 | 9057  | 35.1 |   |
| 1852 | 16 | 10953 | 10042 | 42   | 14694 | 9370  | 39.6 | 1 |
| 1853 | 21 | 8507  | 8250  | 36.6 |       | 9807  | 39.4 |   |
| 1854 | 21 |       |       |      |       |       |      |   |
| 1855 | 14 | 13897 | 8185  | 33.2 | 10841 | 10256 | 43.4 | 1 |
| 1857 | 14 | 6982  |       | 29.7 | 9312  |       | 46   | 2 |
| 1861 | 3  |       |       |      |       |       |      |   |
| 1862 | 3  | 6493  | 6093  | 24.5 | 7419  |       | 35.9 | 1 |
| 1863 | 3  | 8196  |       | 32.4 | 9595  |       | 42   | 2 |
| 1864 | 13 | 13253 | 11140 | 40.4 | 11678 | 11486 | 48.1 | 1 |
| 1865 | 13 | 12764 | 10513 | 42.5 | 6670  |       | 33.1 | 0 |
| 1866 | 3  | 9730  | 8381  | 33.6 | 10750 | 10669 | 50   | 1 |
| 1867 | 13 | 8814  | 8623  | 37.2 | 8385  |       | 49.8 | 2 |
| 1868 | 13 | 13327 | 11756 | 43   | 20817 |       | 53.4 | 0 |
| 1869 | 12 | 3253  |       | 30.7 |       |       |      |   |
| 1870 | 19 | 2896  |       | 25.8 |       |       |      |   |
| 1871 | 19 | 12699 | 10630 |      | 15040 | 12985 | 60.2 | 0 |
| 1874 | 18 | 4991  |       | 38.5 |       |       |      |   |
| 1875 | 18 | 6391  | 6459  | 33.9 | 9495  | 9624  | 41.9 | 1 |
| 1879 | 2  | 7855  | 6595  | 31.6 | 10714 | 9597  | 46.6 | 1 |
| 1880 | 2  | 8539  | 8062  | 35.4 | 10424 | 8845  | 35.7 | 1 |
| 1881 | 2  | 10631 | 9669  | 38.5 |       |       |      | 0 |
| 1883 | 10 | 8194  |       |      | 6846  | 6364  |      | 0 |
| 1884 | 6  | 9902  | 8827  | 30.7 | 7490  | 7313  | 34   | 1 |
| 1885 | 4  | 14908 | 11040 | 37   |       |       |      |   |
| 1889 | 6  | 10516 | 8875  | 34.7 | 11123 |       | 48   | 1 |
| 1890 | 4  | 7822  | 7480  | 23.8 | 8733  | 8658  | 38.1 | 2 |
| 1891 | 4  | 10412 | 10412 | 33.3 | 10896 | 8899  | 40.2 |   |
| 1893 | 4  | 6543  | 5472  | 23.4 | 9427  | 8291  | 32.6 | 1 |
| 1896 | 17 | 3954  |       |      |       |       |      |   |
| 1898 | 21 | 7786  |       | 36   | 7682  | 7329  | 29   | 0 |
| 1899 | 14 | 7778  |       | 33.7 | 10057 | 10057 | 49.4 | 1 |
| 1900 | 14 | 14345 | 8238  | 37.7 | 9730  |       | 39.7 | 0 |
| 1902 | 14 | 7730  | 7485  | 30.4 | 10593 |       | 47.7 | 1 |
| 1903 | 14 | 4263  |       | 25.6 | 7965  | 6109  | 23.2 | 2 |

|      |    |       |       |      |       |       |      |   |
|------|----|-------|-------|------|-------|-------|------|---|
| 1904 | 14 | 7476  |       | 35.3 | 8034  | 7720  | 38.6 | 1 |
| 1907 | 1  | 11305 | 9804  |      | 13647 | 12405 | 47.9 | 0 |
| 1908 | 11 | 3549  |       | 43.2 | 7683  |       | 42.2 | 1 |
| 1909 | 11 | 16241 | 11175 | 41.6 | 16381 | 12736 | 55.8 |   |
| 1910 | 3  | 7461  |       | 32.6 | 17554 | 9246  | 38.1 | 2 |
| 1911 | 13 | 6731  |       | 26   | 8306  | 8070  | 32.8 | 1 |
| 1912 | 12 | 7411  |       | 35.2 | 7228  | 6965  | 33.8 | 1 |
| 1913 | 12 | 6627  |       | 29.3 |       |       |      | 0 |
| 1914 | 12 | 14113 | 10089 | 40.5 | 1797  |       |      | 0 |
| 1915 | 12 | 427   |       |      |       |       |      |   |
| 1917 | 19 | 20864 | 10570 | 43.7 |       |       |      | 0 |
| 1918 | 19 | 9210  | 8698  |      | 14866 | 10532 | 48.9 | 1 |
| 1919 | 18 | 13500 | 10353 | 37.9 | 10053 |       | 46   | 1 |
| 1922 | 20 | 12727 | 8770  | 35.3 | 531   |       |      |   |
| 1925 | 15 | 10322 | 7767  | 32.1 | 11873 | 10770 | 46   |   |
| 1928 | 2  | 8311  | 7617  | 33   | 8320  |       | 48   | 1 |
| 1929 | 2  | 7883  | 7883  | 37.3 | 10426 | 10135 | 48.6 | 1 |
| 1931 | 10 | 11964 | 8850  |      | 8114  |       |      | 1 |
| 1932 | 10 | 7886  | 7510  |      | 7935  |       |      | 1 |
| 1933 | 6  | 9426  |       | 34.2 | 12287 | 10100 | 45.5 |   |
| 1935 | 5  | 8527  |       | 29.1 | 7883  | 7883  | 33.1 | 1 |
| 1937 | 5  | 8006  | 8006  | 28.7 | 7640  | 7433  | 33.5 |   |
| 1938 | 6  | 8911  | 7700  | 31.5 | 10879 | 9568  | 37.8 | 1 |
| 1939 | 5  | 11553 | 9379  | 37.4 | 9378  | 8935  | 36   | 1 |
| 1940 | 6  | 10540 | 9294  | 33.8 | 10120 | 9048  | 35.8 |   |
| 1941 | 4  | 12998 | 10781 | 37.4 | 13918 | 11391 | 43.8 | 2 |
| 1942 | 4  | 9242  |       | 33.6 | 12290 | 10900 | 40.5 |   |
| 1943 | 5  | 8631  | 7677  | 36.4 | 9152  | 9152  | 33.2 |   |
| 1945 | 17 | 4623  |       |      | 9107  | 9107  |      |   |
| 1946 | 17 | 6277  |       |      | 11606 | 9569  |      |   |
| 1947 | 21 | 5229  |       | 26.2 | 8463  | 7292  | 33.8 | 1 |
| 1949 | 14 | 7634  | 6898  | 26.9 | 9834  | 9771  | 38.3 | 2 |
| 1952 | 1  | 12399 | 8894  | 35.7 | 13427 | 10863 | 50   | 0 |
| 1953 | 1  | 6062  |       | 28.5 |       |       |      | 2 |
| 1954 | 3  | 7603  |       | 29.4 | 8543  | 8364  | 39.6 | 2 |
| 1955 | 13 |       |       |      |       |       |      |   |
| 1956 | 12 | 8442  | 8382  | 34.2 | 9546  | 9443  | 48.9 | 1 |
| 1957 | 12 |       |       |      |       |       |      |   |
| 1958 | 1  | 9996  | 9422  | 33.9 | 14034 | 12047 | 46   | 2 |
| 1962 | 19 | 19831 | 10139 | 36.4 |       |       |      | 0 |
| 1963 | 19 |       |       |      |       |       |      |   |

|      |    |       |       |      |       |       |      |   |
|------|----|-------|-------|------|-------|-------|------|---|
| 1966 | 15 | 9159  | 8476  | 33.2 | 7890  |       | 41.3 |   |
| 1967 | 15 | 8334  | 8073  | 33   | 6588  |       | 39.6 |   |
| 1969 | 4  | 7895  |       | 36.6 | 10067 | 10025 | 58.6 |   |
| 1973 | 5  | 8497  |       | 29.4 | 11179 | 11179 | 43.1 | 1 |
| 1974 | 4  | 5161  |       | 20.5 | 5141  |       | 21.6 |   |
| 1975 | 4  | 9287  |       | 34.4 |       |       |      |   |
| 1977 | 5  | 9438  | 9438  | 33   | 9462  | 8596  | 36.4 |   |
| 1978 | 6  | 7713  |       | 28.1 |       |       |      |   |
| 1979 | 4  | 10223 | 9227  | 31.2 | 11328 | 10356 |      | 1 |
| 1980 | 17 | 15677 | 7849  |      |       |       |      |   |
| 1983 | 21 | 7345  | 6522  | 28.6 | 8032  |       | 49.4 | 2 |
| 1985 | 14 |       |       |      |       |       |      |   |
| 1986 | 21 |       |       |      |       |       |      |   |
| 1987 | 14 |       |       |      |       |       |      |   |
| 1991 | 11 | 16245 | 10958 | 48.7 | 15126 | 12852 | 46.7 | 1 |
| 1992 | 11 |       |       |      |       |       |      |   |
| 1993 | 1  | 11755 | 10682 | 39.8 | 17775 | 11816 | 47.1 | 0 |
| 1994 | 11 | 13763 | 8273  | 40.7 | 11702 | 11533 | 46.8 | 2 |
| 1995 | 3  | 5862  | 5645  | 21.4 | 6843  | 6754  | 31.3 | 2 |
| 1996 | 1  | 3533  |       | 24.9 |       |       |      | 0 |
| 1998 | 11 | 9344  | 6792  | 38.2 |       |       |      | 2 |
| 1999 | 12 | 12111 | 7676  | 33.4 | 6859  |       | 34.1 | 2 |
| 2000 | 12 | 11414 | 8027  | 34.7 | 10092 | 10092 | 43.2 | 1 |
| 2001 | 1  | 7701  |       | 36.2 | 9456  | 9267  | 43   | 1 |
| 2003 | 19 | 7897  |       |      | 13295 | 11299 | 45.7 | 0 |
| 2004 | 19 | 13290 | 10529 |      | 16869 | 14184 | 56.5 | 0 |
| 2005 | 19 | 11160 | 10816 |      | 12618 | 12414 | 48.9 | 0 |
| 2083 | 2  | 12683 | 11456 | 48.2 | 13993 | 13993 |      | 2 |
| 2087 | 16 |       |       |      |       |       |      |   |
| 2088 | 16 | 7844  | 7395  | 28.8 | 12763 | 10376 | 45.6 | 1 |
| 2089 | 21 | 7225  |       | 31.8 | 8725  |       | 40   | 1 |
| 2093 | 11 | 10907 |       | 47.5 | 5840  |       | 47.5 | 2 |
| 2095 | 1  | 12342 | 7812  | 29.3 |       |       |      | 0 |
| 2096 | 3  | 5720  | 5555  | 23.5 | 6858  |       | 31.7 | 2 |
| 2097 | 13 | 9560  | 8760  | 35.8 | 9999  |       |      | 0 |
| 2102 | 19 |       |       |      |       |       |      |   |
| 2103 | 19 |       |       |      |       |       |      |   |
| 2104 | 18 |       |       |      |       |       |      |   |
| 2107 | 17 | 6728  |       |      | 11000 | 9859  |      |   |
| 2109 | 16 | 10145 | 10011 | 39.2 | 20230 | 13283 | 52.1 | 1 |
| 2110 | 14 | 8515  | 7455  | 30.4 | 11622 | 11048 | 46.6 | 2 |

|      |    |       |       |      |       |       |      |   |
|------|----|-------|-------|------|-------|-------|------|---|
| 2111 | 16 | 12691 | 8569  | 32   |       | 8700  | 41.5 | 1 |
| 2113 | 14 | 7471  |       | 37.7 | 8335  |       | 37.4 | 1 |
| 2115 | 1  | 7732  | 7571  |      | 13040 | 11212 | 47.6 | 0 |
| 2116 | 1  | 1048  |       | 26.2 |       |       |      |   |
| 2117 | 1  | 7843  | 7802  | 34   | 13508 | 10655 | 39.8 | 0 |
| 2118 | 13 | 12234 | 9583  | 35   | 12126 | 9357  | 49.4 | 1 |
| 2119 | 13 | 8912  |       |      | 10224 |       |      | 2 |
| 2120 | 12 | 10666 | 7386  | 37.2 | 12211 | 9461  | 40   | 1 |
| 2121 | 12 | 588   |       | 16.2 |       |       |      |   |
| 2122 | 8  | 232   |       |      |       |       |      |   |
| 2125 | 18 | 8501  | 8652  | 35.9 | 9356  | 9413  | 42.4 | 0 |
| 2126 | 18 | 11761 | 11416 | 41.8 |       | 11420 | 45.4 | 2 |
| 2128 | 16 | 10672 | 8676  |      |       |       |      |   |
| 2130 | 16 | 16436 | 11187 | 49.9 |       |       |      | 2 |
| 2131 | 21 | 6351  | 6261  | 23.6 | 8097  | 7038  | 32.2 | 2 |
| 2132 | 16 | 13280 | 10329 | 43.2 | 11350 | 9765  | 42.4 | 1 |
| 2133 | 11 | 8040  | 7397  | 31.5 | 12517 | 10820 | 45.5 | 2 |
| 2134 | 11 | 7052  |       | 34.5 | 13716 | 10386 | 45.6 | 1 |
| 2135 | 1  | 9840  |       | 37.9 | 13956 | 11862 | 46.4 | 1 |
| 2136 | 3  | 8226  | 7339  | 27.1 |       |       |      | 1 |
| 2137 | 1  | 10727 | 10204 | 39.5 | 10454 | 10394 | 39.1 | 1 |
| 2138 | 13 | 118   |       |      |       |       |      |   |
| 2139 | 13 | 13652 | 8753  | 31.2 |       |       |      | 0 |
| 2140 | 13 | 12262 | 8709  | 35.4 | 11734 |       |      | 2 |
| 2141 | 12 | 18280 | 9152  | 36.6 | 13424 | 10373 | 43.5 | 2 |
| 2148 | 18 | 7944  | 7512  | 30.6 | 10289 | 9635  | 41.9 | 0 |
| 2150 | 4  |       |       |      |       |       |      |   |
| 2152 | 16 | 6846  | 6758  | 27   | 6673  |       | 29.1 | 1 |
| 2153 | 16 | 6990  |       | 29.5 | 11039 | 10050 | 41.1 | 2 |
| 2154 | 21 |       |       |      |       |       |      |   |
| 2155 | 14 | 8303  |       | 32.8 | 10026 |       | 41.8 | 0 |
| 2156 | 14 | 1188  |       |      |       |       |      |   |
| 2159 | 11 | 5517  |       | 25.3 | 6668  |       | 34   |   |
| 2161 | 3  | 8079  | 7486  | 27.6 | 5302  |       | 24.4 | 1 |
| 2162 | 1  | 9674  | 6677  | 26   | 15171 | 12677 | 58.1 | 0 |
| 2163 | 1  | 8357  |       | 34.2 | 13720 | 11816 | 47.1 | 2 |
| 2164 | 1  | 12016 | 8678  | 32.9 | 7943  |       | 42.4 | 1 |
| 2165 | 3  | 8759  |       | 37.5 | 4250  |       | 42.4 | 2 |
| 2166 | 13 | 10795 | 10020 | 36   | 10235 | 9860  |      | 1 |
| 2167 | 13 | 11950 | 8810  | 33.8 |       |       |      | 2 |
| 2168 | 12 | 7356  | 5830  | 23.4 | 8801  | 8629  | 41.5 | 1 |

|      |    |       |       |      |       |       |      |   |
|------|----|-------|-------|------|-------|-------|------|---|
| 2169 | 1  | 6908  |       | 29.6 | 12477 | 10994 | 43.8 | 2 |
| 2173 | 19 | 4448  |       |      | 8385  | 7894  | 44.8 | 1 |
| 2174 | 18 | 18043 | 12561 | 46.8 |       | 11334 |      | 2 |
| 2175 | 18 | 13867 | 9798  | 35   |       | 12603 | 49.1 | 1 |
| 2177 | 4  | 9214  |       | 32.5 | 2896  |       |      |   |
| 2178 | 21 | 8973  | 8169  | 31.6 | 13024 | 10225 | 36   | 1 |
| 2179 | 16 | 17786 | 11262 | 42.5 |       | 10924 | 44.2 | 1 |
| 2180 | 16 | 9862  |       | 39.9 | 11523 | 11523 | 46.5 | 1 |
| 2184 | 1  | 1541  |       | 29.4 |       |       |      |   |
| 2185 | 1  | 12913 | 9825  | 37.7 | 15544 | 12441 | 47.3 | 1 |
| 2186 | 13 | 10136 |       | 39.4 | 9684  |       | 42.2 | 1 |
| 2187 | 13 | 12388 | 11322 | 41.5 | 3593  |       |      | 0 |
| 2188 | 13 | 12254 | 12136 | 43.8 | 13347 | 12914 | 49.9 | 1 |
| 2189 | 13 | 2738  |       |      |       |       |      |   |
| 2190 | 1  | 8155  |       | 29.7 | 9585  |       | 42.5 | 0 |
| 2191 | 12 | 10747 | 8664  | 35.3 | 7955  |       | 43   | 2 |
| 2194 | 8  | 17699 | 11224 |      | 9945  |       |      | 1 |
| 2195 | 19 | 9792  |       |      | 12330 | 12330 |      |   |
| 2196 | 18 | 16513 | 11182 | 46.1 | 7358  |       | 56.8 | 1 |
| 2198 | 20 | 5681  | 4905  | 23.4 | 10494 | 9579  | 40.6 |   |
| 2200 | 14 | 766   |       | 23.4 |       |       |      |   |
| 2201 | 21 | 7378  | 7339  | 31.8 | 9523  | 9680  | 40.6 | 1 |
| 2202 | 16 |       |       |      |       |       |      |   |
| 2205 | 11 | 22721 | 11391 | 60   |       |       |      | 0 |
| 2206 | 1  | 13080 | 10375 |      | 5937  |       | 51.5 | 2 |
| 2207 | 1  | 16859 | 9573  | 34.2 | 17088 | 12039 | 50.7 | 0 |
| 2209 | 3  | 3482  |       | 30.3 |       |       |      |   |
| 2210 | 13 | 11624 | 9310  | 36.9 | 11190 |       | 47.5 | 1 |
| 2211 | 13 | 12542 | 10572 | 40.4 | 10059 |       |      | 2 |
| 2212 | 13 | 10985 |       | 40.2 |       |       |      | 0 |
| 2213 | 13 | 9281  | 8765  |      | 13926 |       |      | 2 |
| 2214 | 12 | 7356  | 7168  | 37.3 | 9301  | 8033  | 37.3 | 1 |
| 2215 | 12 | 523   |       |      |       |       |      |   |
| 2219 | 19 | 9233  | 9210  |      |       |       |      |   |
| 2220 | 18 | 8947  |       | 34.5 | 12247 | 11497 | 48.5 | 1 |
| 2221 | 18 | 5560  |       | 27.8 | 8890  | 8111  | 31.6 | 0 |
| 2222 | 18 | 9138  | 9138  | 35.7 | 12298 | 11561 | 54.1 | 0 |
| 2224 | 4  | 8016  |       | 29.5 | 11438 | 10011 | 39.7 | 1 |
| 2225 | 5  | 10899 | 10899 | 37.8 | 11756 | 9453  | 35.2 | 1 |
| 2227 | 14 |       |       |      |       |       |      |   |
| 2228 | 14 | 7790  | 7609  | 30.6 |       |       |      | 1 |

|      |    |       |       |      |       |       |      |   |
|------|----|-------|-------|------|-------|-------|------|---|
| 2229 | 14 | 3475  |       | 19.5 |       |       |      |   |
| 2232 | 11 | 7031  |       | 37.9 | 742   |       |      | 2 |
| 2233 | 1  | 8620  | 6823  | 25   | 10985 | 10722 | 42.6 | 2 |
| 2234 | 3  | 3143  |       | 14.3 |       |       |      | 1 |
| 2235 | 13 | 5413  |       |      |       |       |      |   |
| 2236 | 13 | 11657 | 9534  | 34.5 | 12232 |       |      | 2 |
| 2237 | 12 | 13524 | 10853 | 46.9 | 10258 | 10110 | 46.2 | 1 |
| 2239 | 8  | 23856 | 11456 |      |       |       |      | 0 |
| 2241 | 18 | 7588  | 7423  | 34   | 9242  |       | 40.1 | 0 |
| 2242 | 18 | 16972 | 12527 | 49   | 12132 |       | 49.8 | 1 |
| 2250 | 13 | 10511 | 8706  | 34.2 | 4557  |       |      |   |
| 2251 | 20 | 7209  |       | 28   | 4432  |       | 28   |   |

#L1, lactation 1; L2, lactation 2; TMY, total milk yield; 305d, 305-day milk yield; PY, peak milk yield. SCC class. Animals were classified as affected, intermediate or unaffected animals. Unaffected animals never had a SCC >200,000 cells mL<sup>-1</sup> (class 0). Affected cows, classified as mastitic, had a SCC >300,000 cells mL<sup>-1</sup> in two consecutive tests or in four non-consecutive tests, or were cows with a SCC >500,000 cells mL<sup>-1</sup> in any one test during any lactation period, regardless of parity (class 2). Intermediate animals were placed in class 1.
